# Supplementary material for: Dendrimeric magnetic nanoparticle cores with Co-phthalocyanine tags and their application in the synthesis of tetrahydrobenzo[b]pyran derivatives
Source: Royal Society of Chemistry journal article supplement (doi:10.1039/c6nj00243a), 2016-01-01

## **Dendrimeric magnetic nanoparticle cores with Co-phthalocyanine tags and its application in the synthesis of tetrahydrobenzo[b]pyran derivatives**

Mohamad Ali Zolfigol,<sup>\*a</sup> Maliheh. Safaiee<sup>b\*</sup> and Neda Bahrami-Nejad <sup>a</sup>

---

*Department of Organic Chemistry, Faculty of Chemistry, Bu-Ali Sina University, Hamedan 6517838683, Iran, E-mail: zolfi@basu.ac.ir & mzolfigol@yahoo.com, 6517838683, Tel: +988138282807, Fax: +988138380709*

*Department of Medicinal Plants Production, Nahavand University, Nahavand, 6593139565, Iran. E-mail: azalia\_s@yahoo.com & msafaiee@nahgu.ac.ir & [malihehsafaiee@gmail.com](mailto:malihehsafaiee@gmail.com)*

**Fig S1.** The IR spectrum of 2-amino-4-(3-ethoxy-4-hydroxyphenyl)-7,7-dimethyl-5-oxo-5,6,7,8-tetrahydro-4H-chromene-3-carbonitrile (Table 3, entry 6)

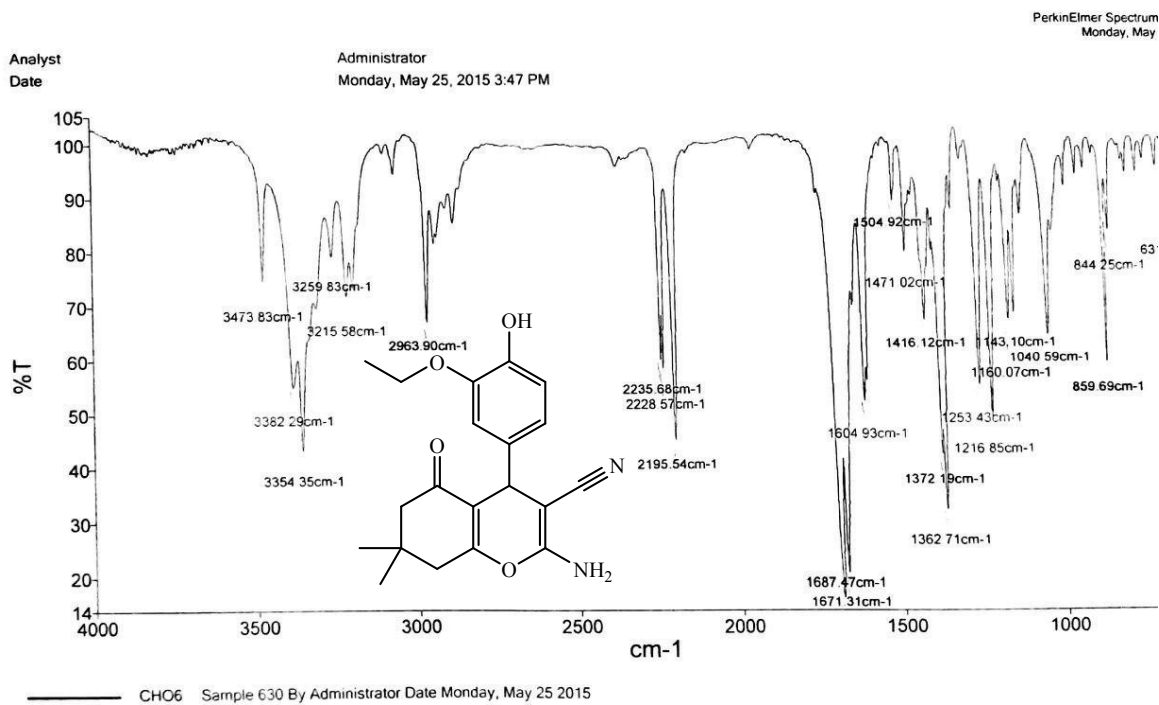

**Fig S2.** The  $^1\text{H}$  NMR spectrum of 2-amino-4-(3-ethoxy-4-hydroxyphenyl)-7,7-dimethyl-5-oxo-5,6,7,8-tetrahydro-4H-chromene-3-carbonitrile (Table 3, entry 6)

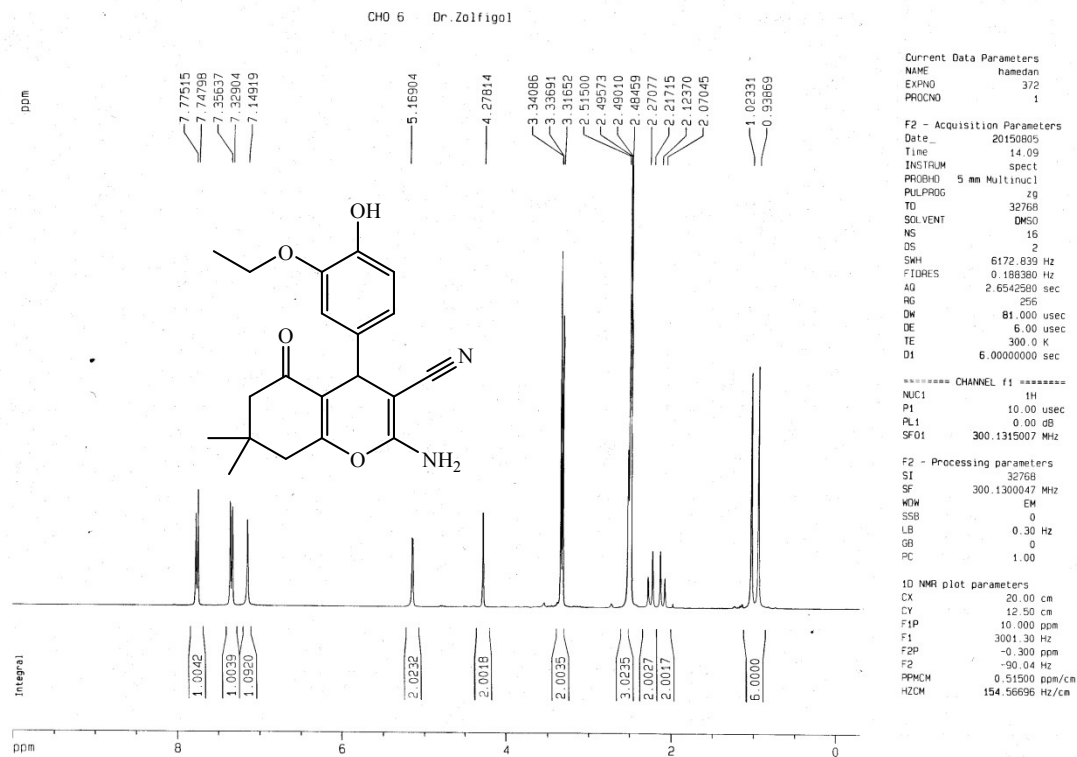

**Fig S3.** The  $^1\text{H}$  NMR spectrum of 2-amino-4-(3-ethoxy-4-hydroxyphenyl)-7,7-dimethyl-5-oxo-5,6,7,8-tetrahydro-4H-chromene-3-carbonitrile (Table 3, entry 6)

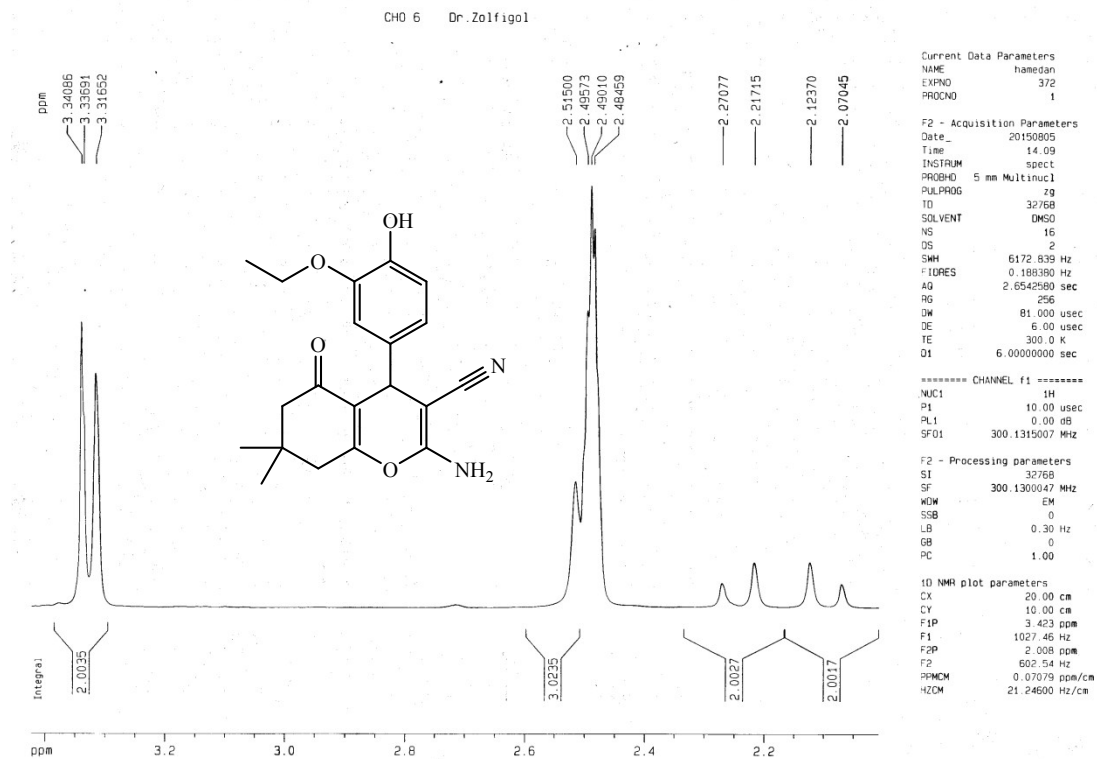

**Fig S4.** The  $^{13}\text{C}$  NMR spectrum of 2-amino-4-(3-ethoxy-4-hydroxyphenyl)-7,7-dimethyl-5-oxo-5,6,7,8-tetrahydro-4H-chromene-3-carbonitrile (Table 3, entry 6)

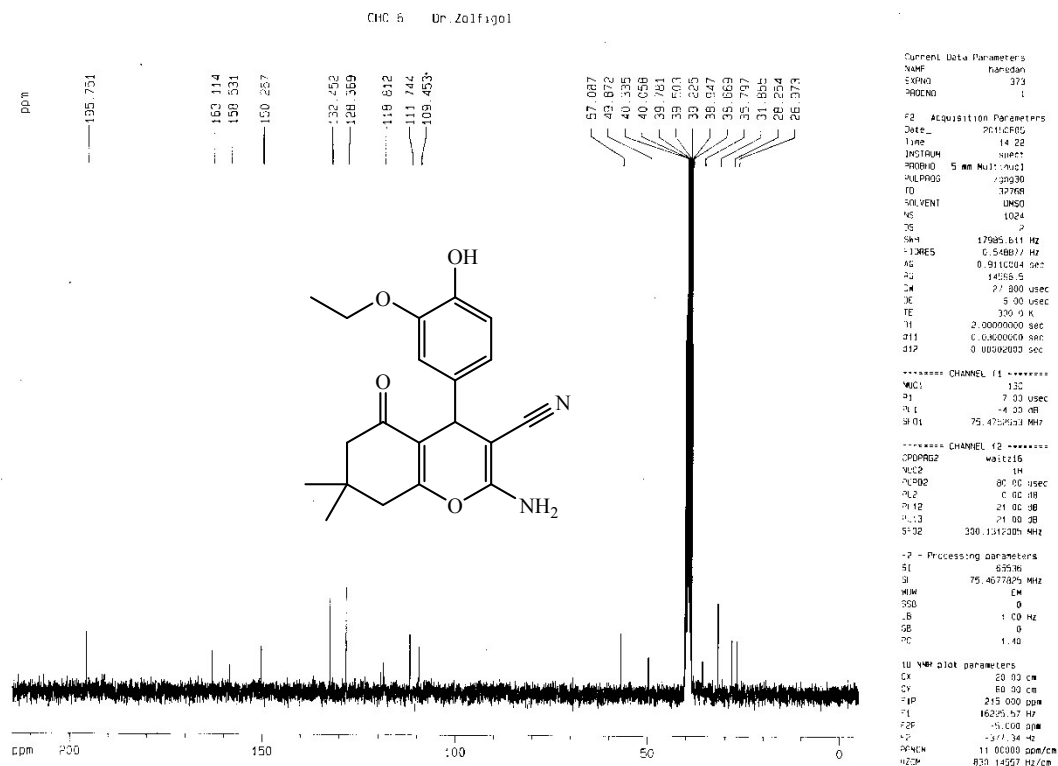

**Fig S5.** The  $^{13}\text{C}$  NMR spectrum of 2-amino-4-(3-ethoxy-4-hydroxyphenyl)-7,7-dimethyl-5-oxo-5,6,7,8-tetrahydro-4H-chromene-3-carbonitrile (Table 3, entry 6)

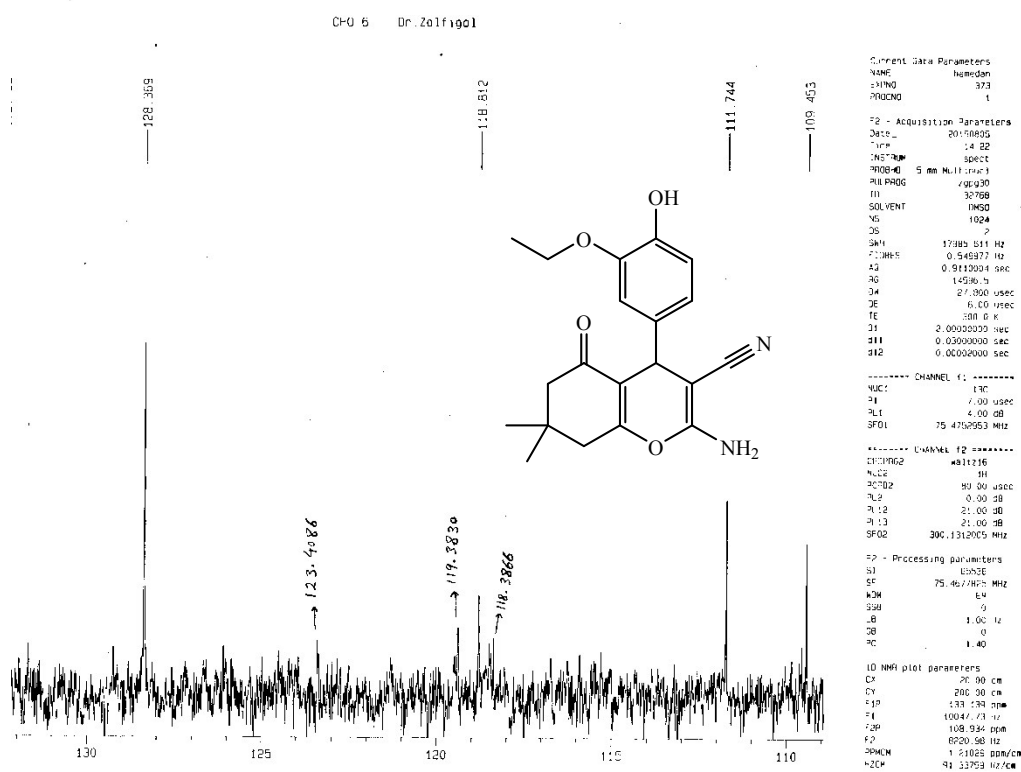

**Fig S6.** The IR spectrum of *2-amino-4-(2-hydroxyphenyl)-7,7-dimethyl-5-oxo-5,6,7,8-tetrahydro-4H-chromene-3-carbonitrile* (Table 3, entry 9)

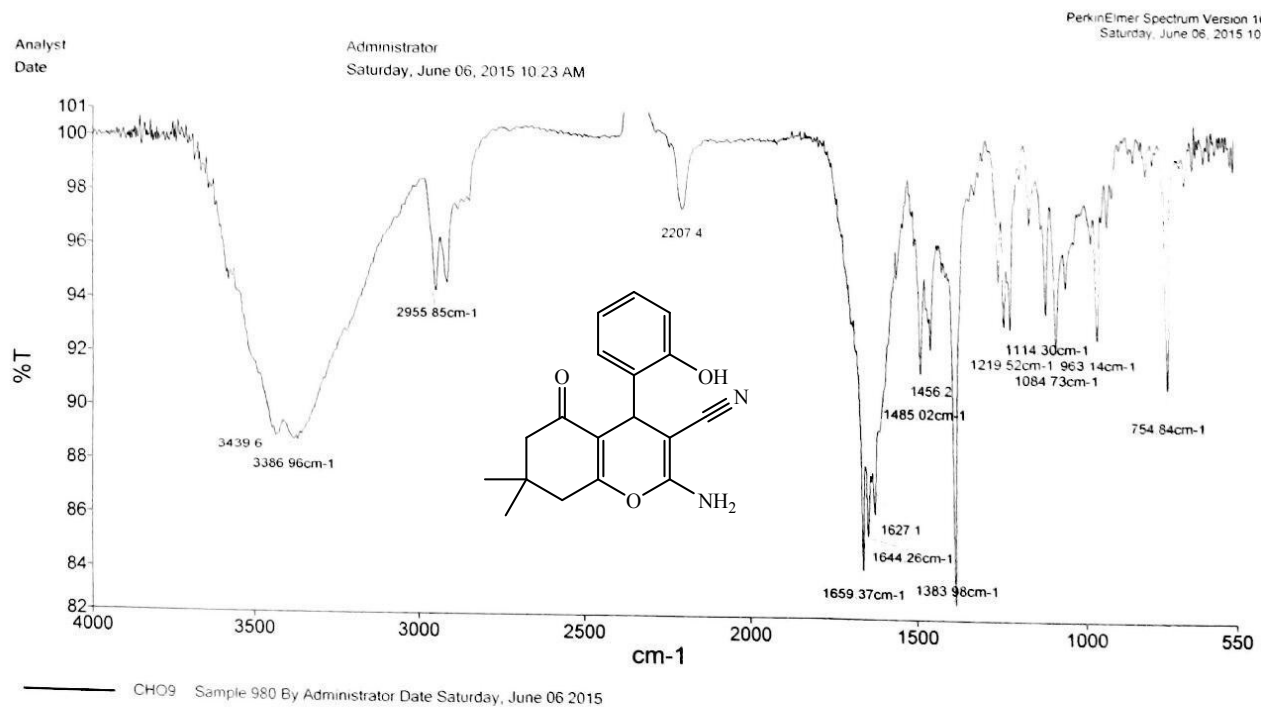

**Fig S7.** The  $^1\text{H}$  NMR spectrum of 2-amino-4-(2-hydroxyphenyl)-7,7-dimethyl-5-oxo-5,6,7,8-tetrahydro-4H-chromene-3-carbonitrile (Table 3, entry 9)

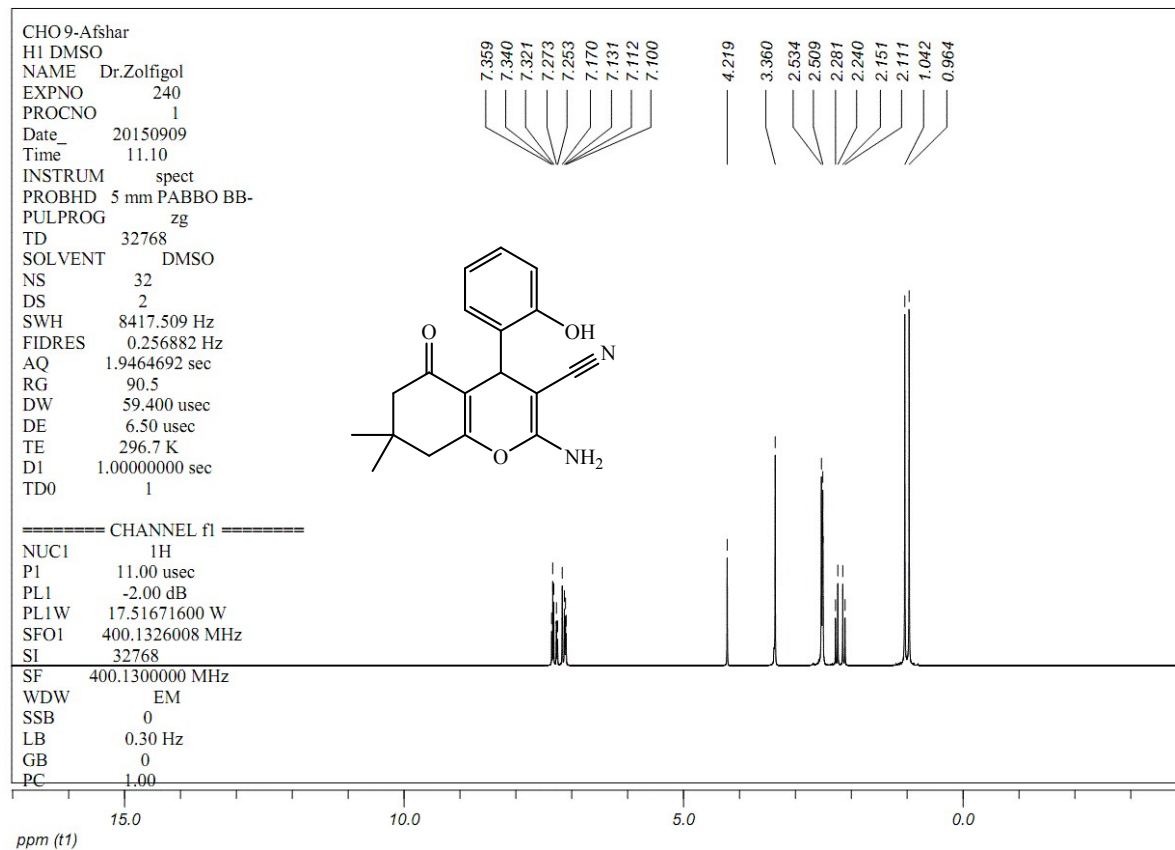



**Fig S8.** The  $^1\text{H}$  NMR spectrum of 2-amino-4-(2-hydroxyphenyl)-7,7-dimethyl-5-oxo-5,6,7,8-tetrahydro-4H-chromene-3-carbonitrile (Table 3, entry 9)

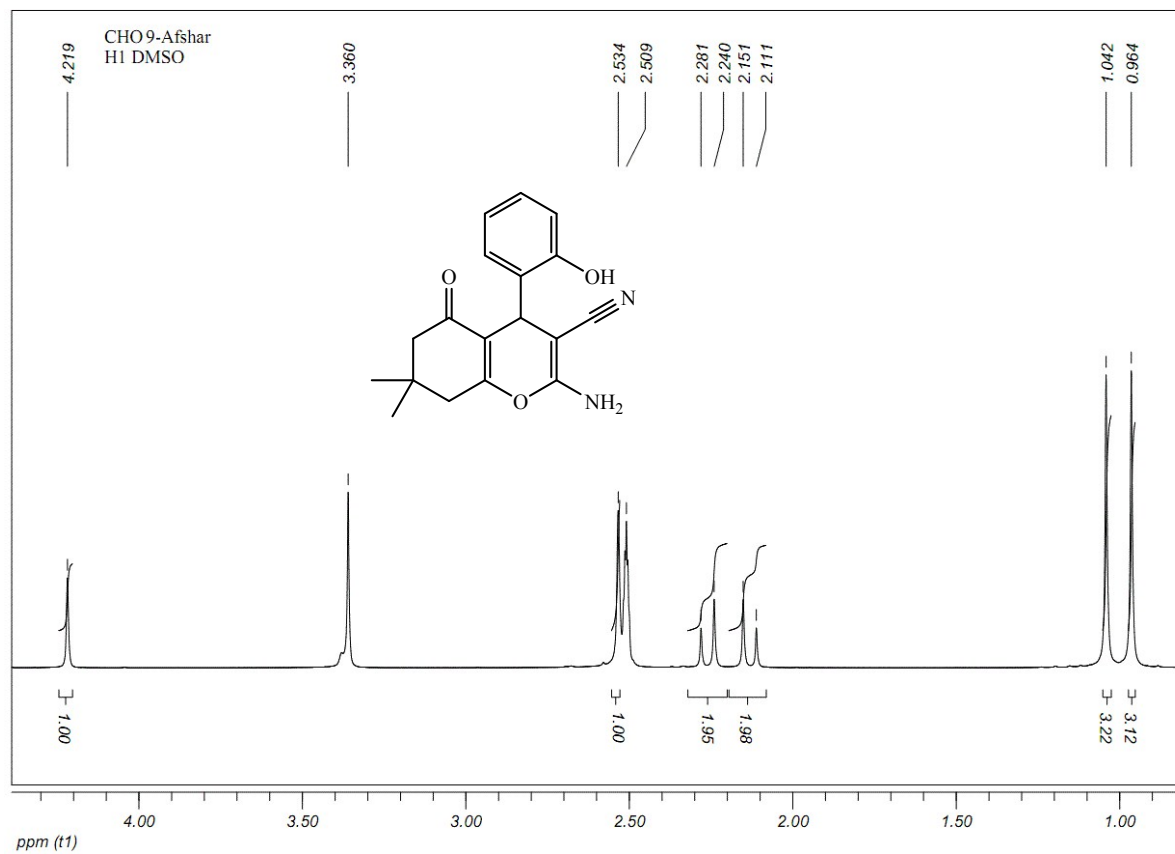

**Fig S9.** The  $^1\text{H}$  NMR spectrum of 2-amino-4-(2-hydroxyphenyl)-7,7-dimethyl-5-oxo-5,6,7,8-tetrahydro-4H-chromene-3-carbonitrile (Table 3, entry 9)

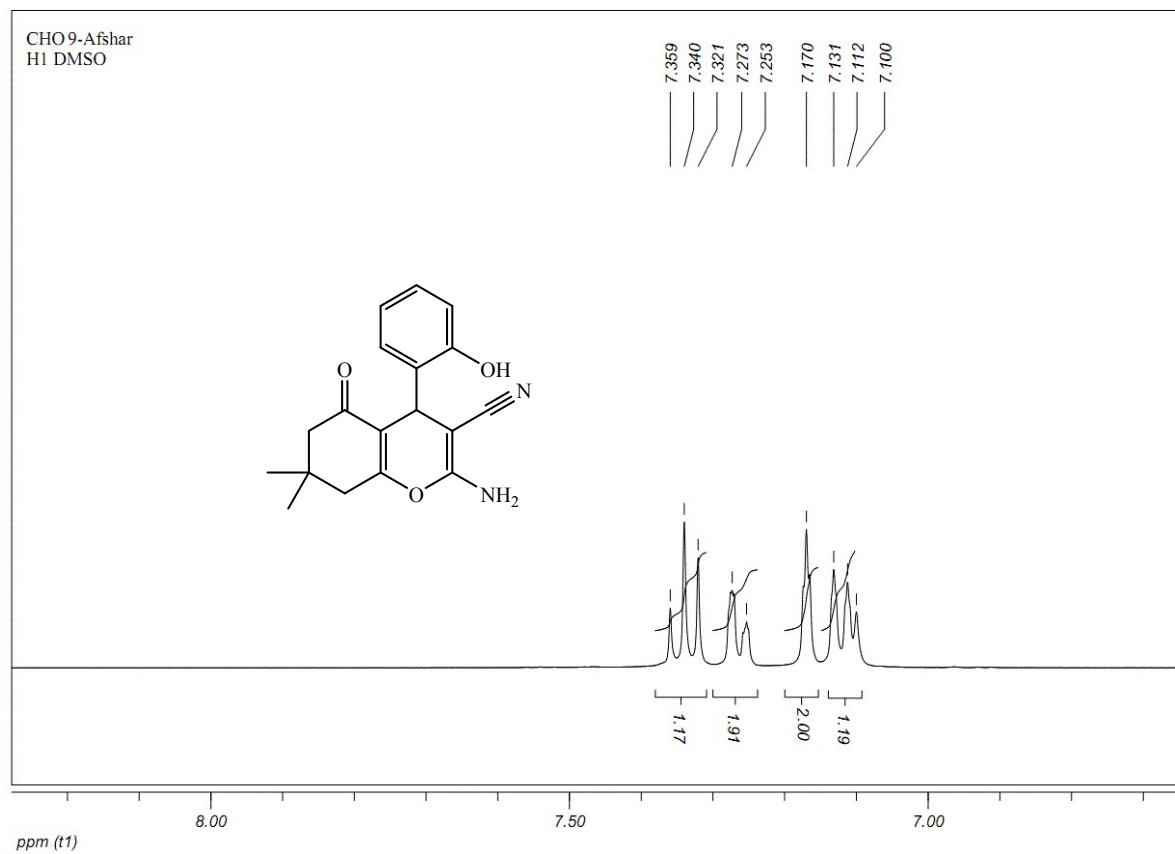

**Fig S10.** The  $^{13}\text{C}$  NMR spectrum of 2-amino-4-(2-hydroxyphenyl)-7,7-dimethyl-5-oxo-5,6,7,8-tetrahydro-4H-chromene-3-carbonitrile (Table 3, entry 9)

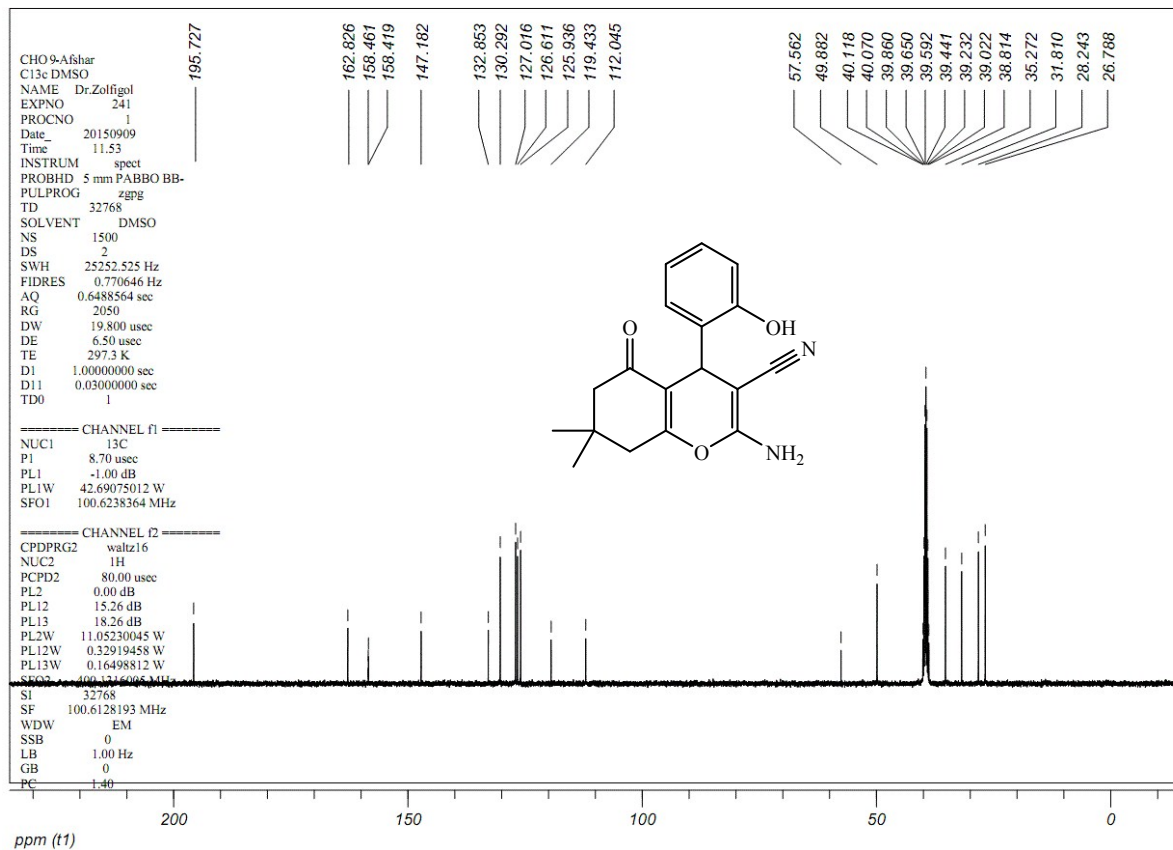

**Fig S11.** The IR spectrum of *2-amino-4-(2-hydroxy-3-methoxyphenyl)-7,7-dimethyl-5-oxo-5,6,7,8-tetrahydro-4H-chromene-3-carbonitrile* (Table 3, entry 10)

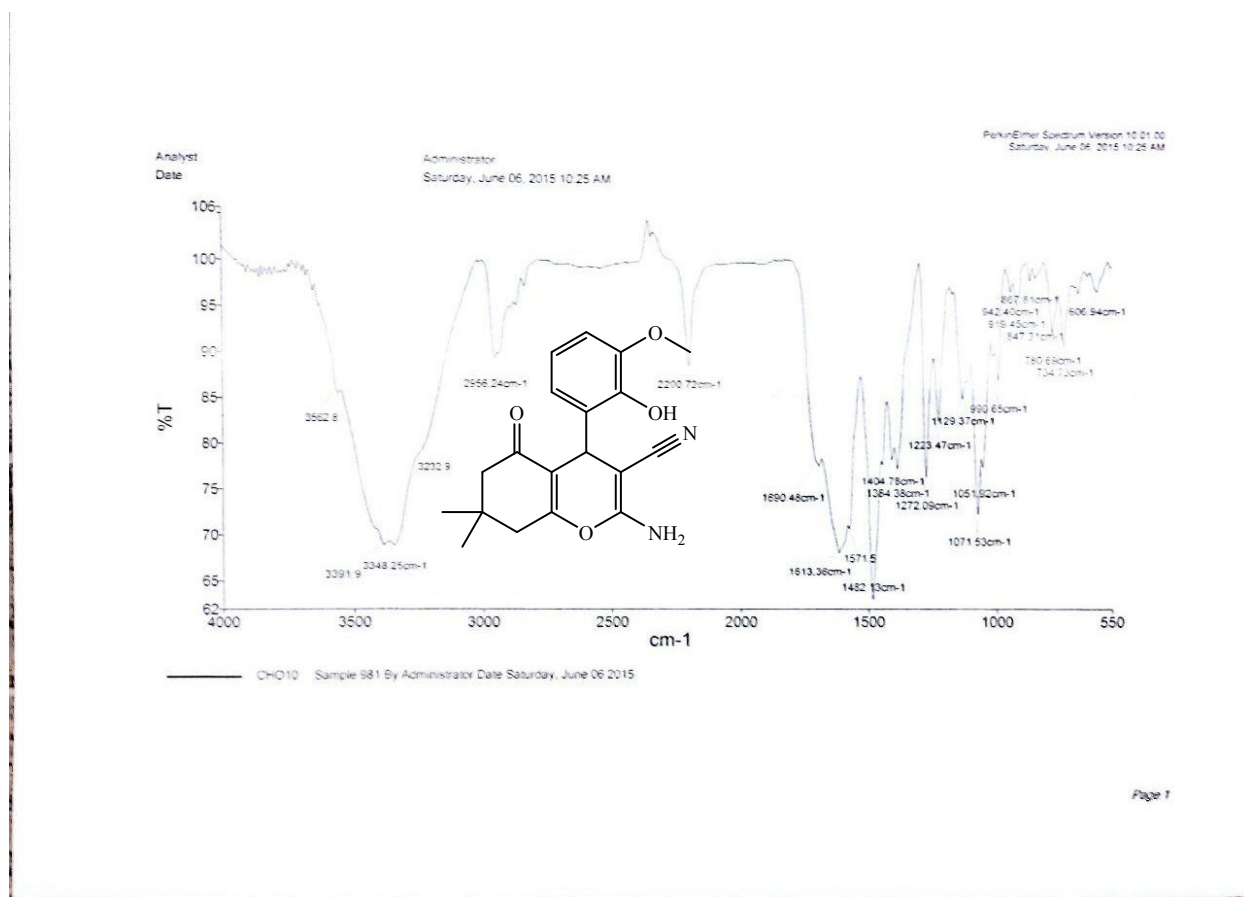

**Fig S12.** The  $^1\text{H}$  NMR spectrum of 2-amino-4-(2-hydroxy-3-methoxyphenyl)-7,7-dimethyl-5-oxo-5,6,7,8-tetrahydro-4H-chromene-3-carbonitrile (Table 3, entry 10)

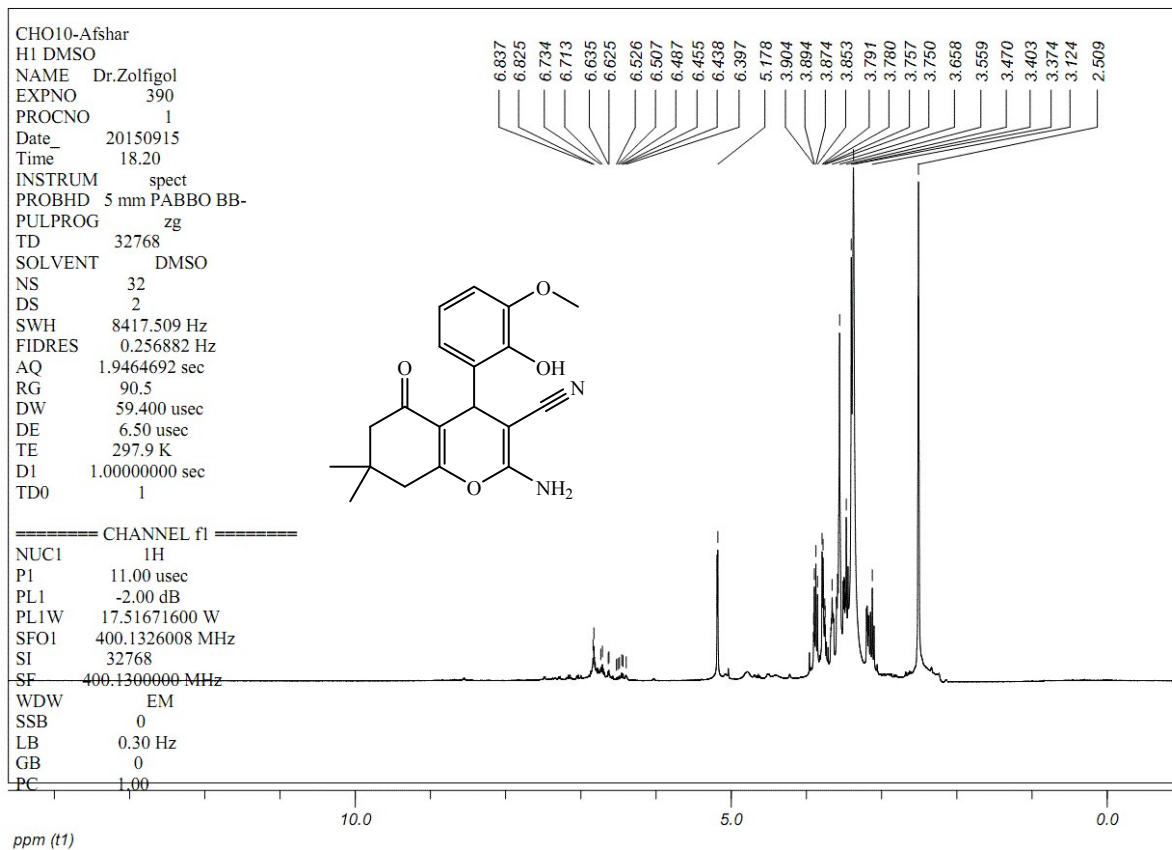

**Fig S13.** The  $^1\text{H}$  NMR spectrum of 2-amino-4-(2-hydroxy-3-methoxyphenyl)-7,7-dimethyl-5-oxo-5,6,7,8-tetrahydro-4H-chromene-3-carbonitrile (Table 3, entry 10)

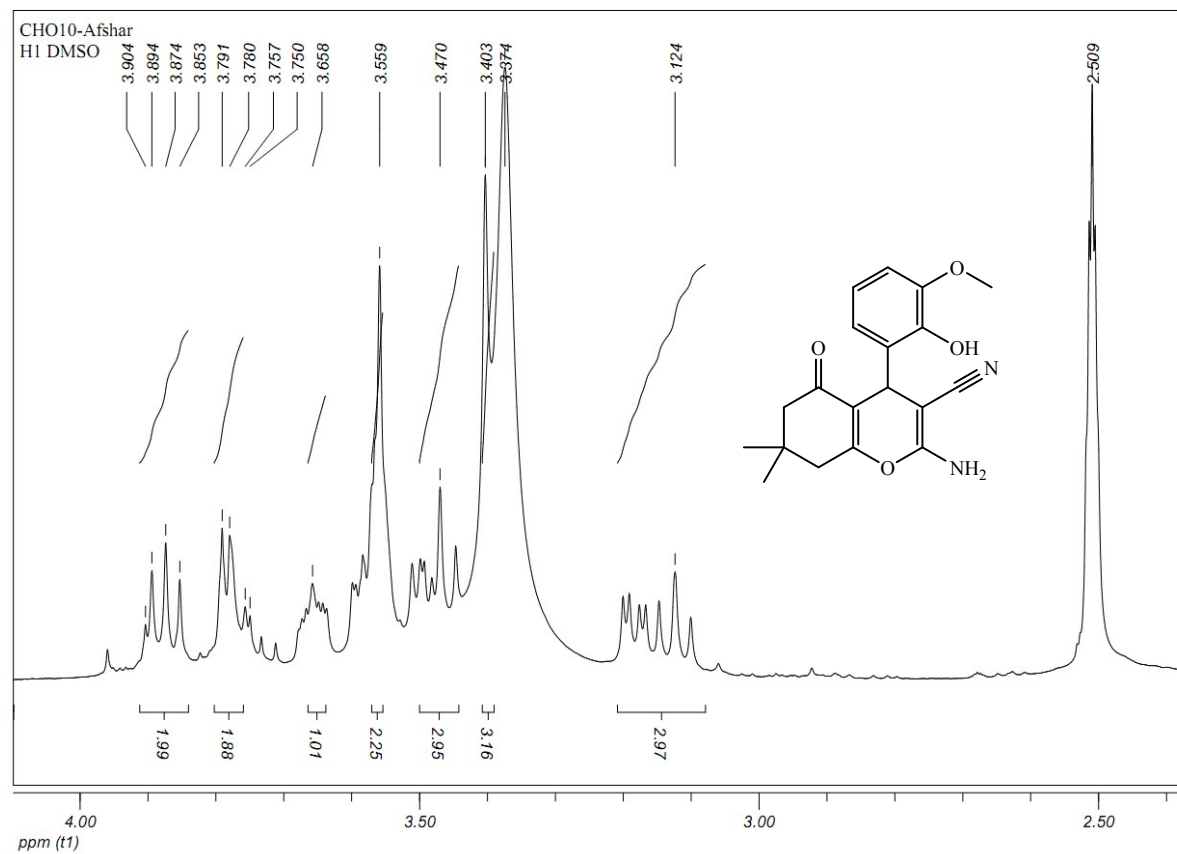

**Fig S14.** The  $^1\text{H}$  NMR spectrum of 2-amino-4-(2-hydroxy-3-methoxyphenyl)-7,7-dimethyl-5-oxo-5,6,7,8-tetrahydro-4H-chromene-3-carbonitrile (Table 3, entry 10)

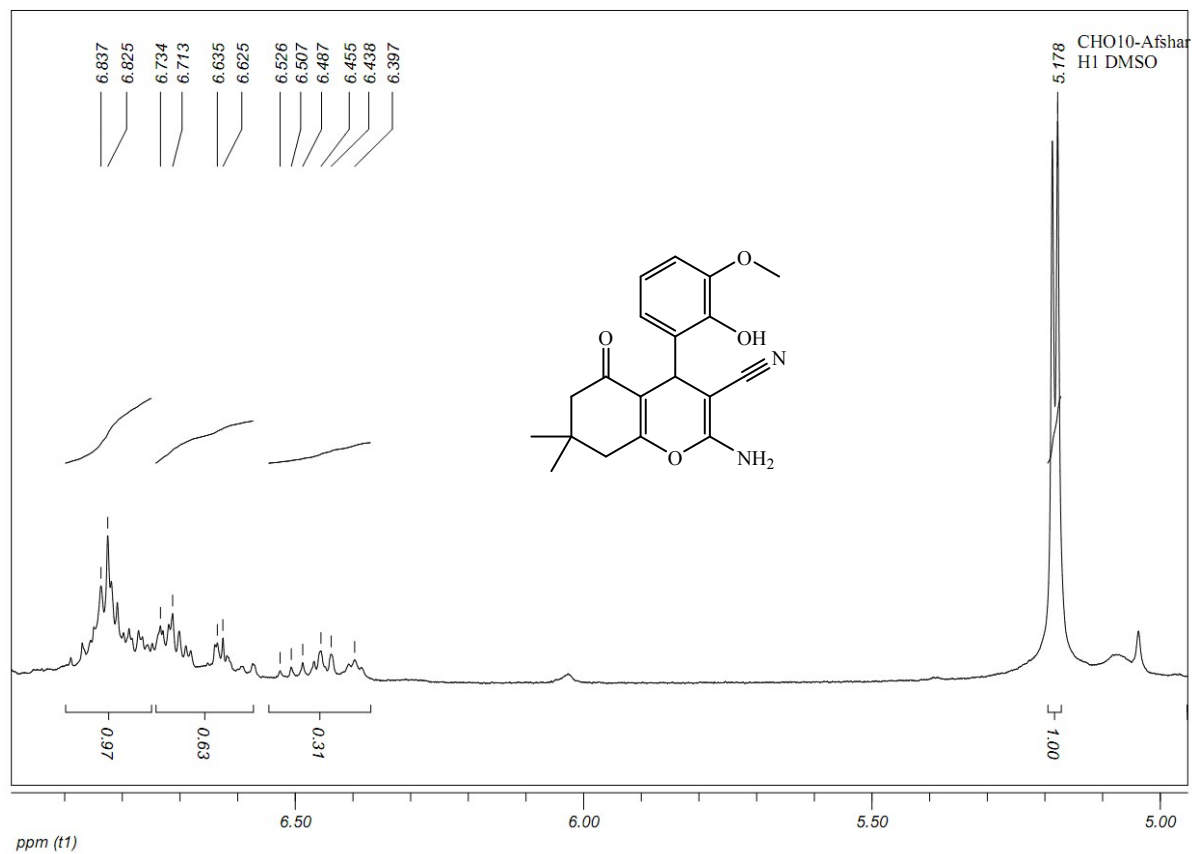

**Fig S15.** The  $^{13}\text{C}$  NMR spectrum of 2-amino-4-(2-hydroxy-3-methoxyphenyl)-7,7-dimethyl-5-oxo-5,6,7,8-tetrahydro-4H-chromene-3-carbonitrile (Table 3, entry 10)

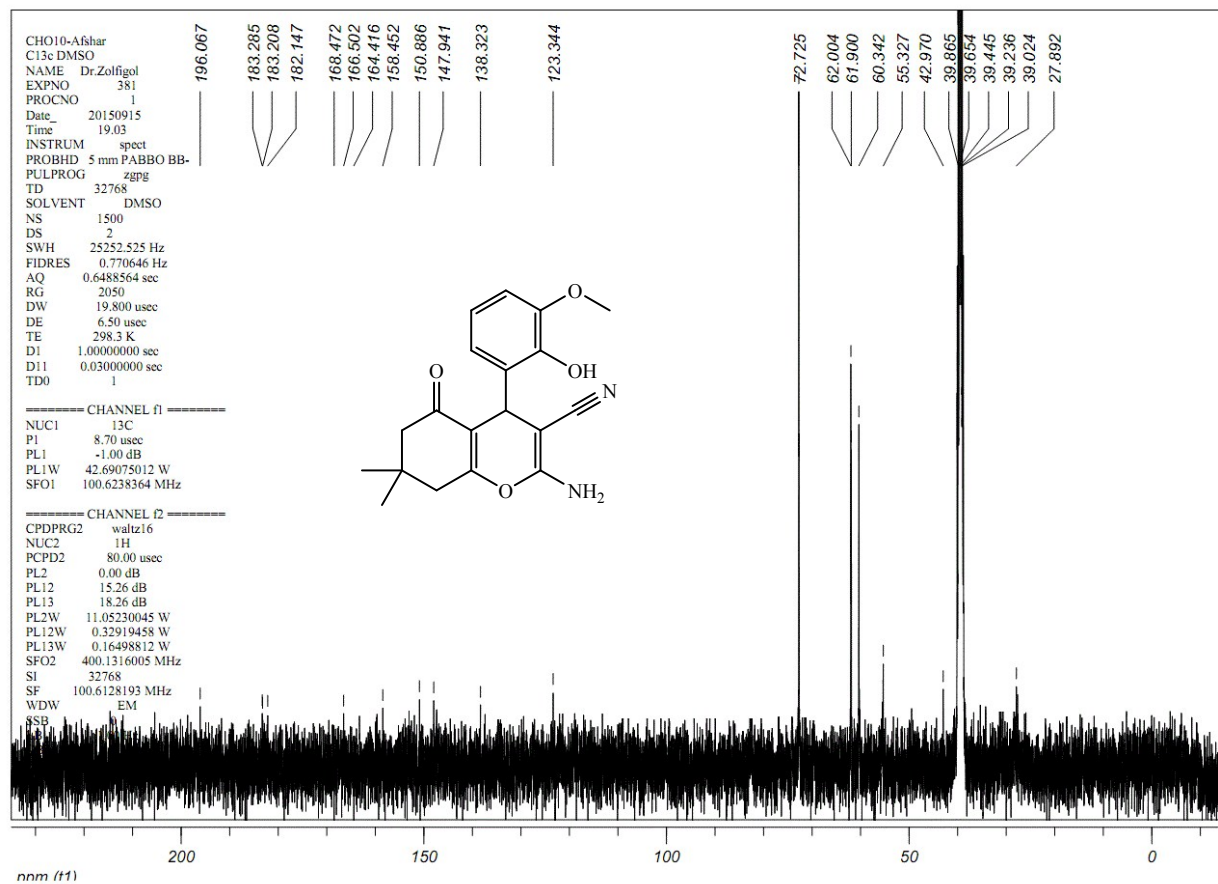



**Fig S16.** The  $^{13}\text{C}$  NMR spectrum of 2-amino-4-(2-hydroxy-3-methoxyphenyl)-7,7-dimethyl-5-oxo-5,6,7,8-tetrahydro-4H-chromene-3-carbonitrile (Table 3, entry 10)

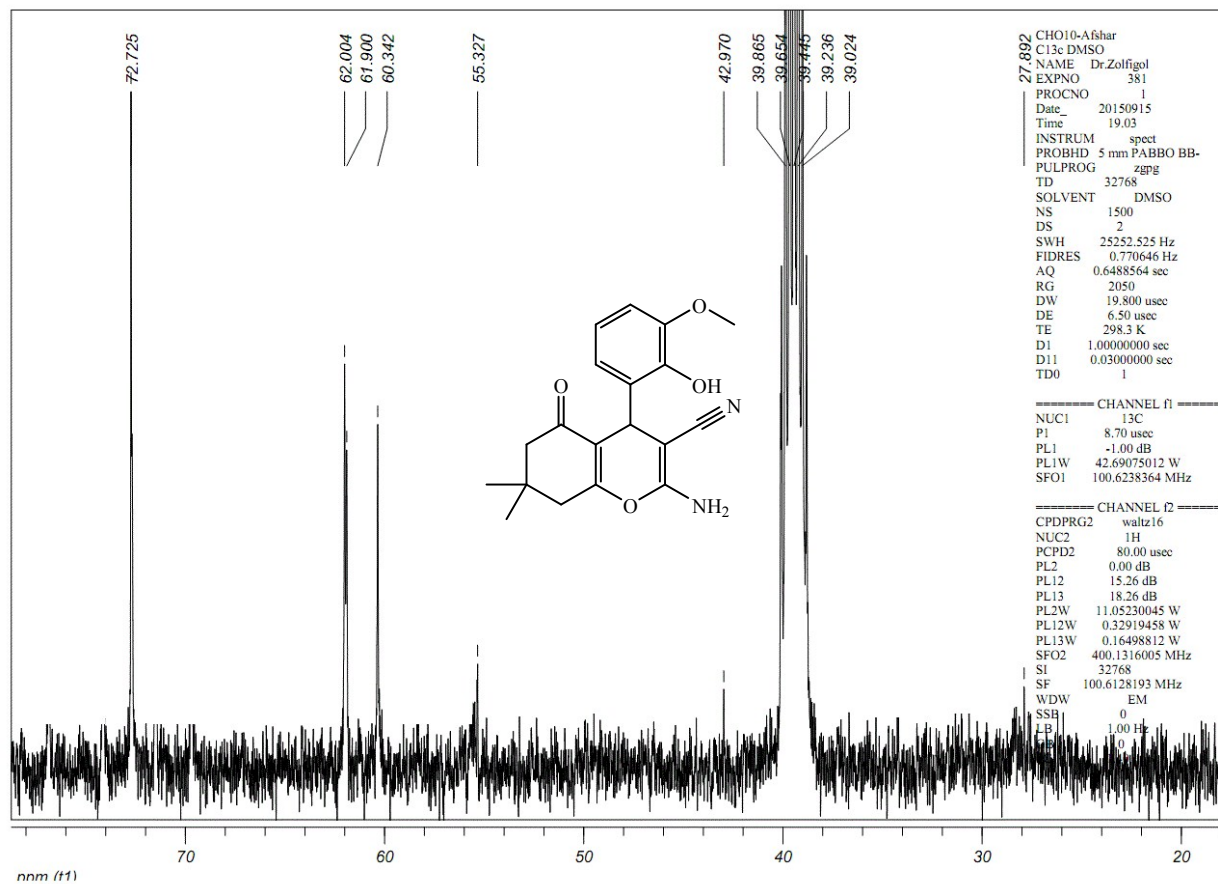

**Fig S17.** The  $^{13}\text{C}$  NMR spectrum of 2-amino-4-(2-hydroxy-3-methoxyphenyl)-7,7-dimethyl-5-oxo-5,6,7,8-tetrahydro-4H-chromene-3-carbonitrile (Table 3, entry 10)

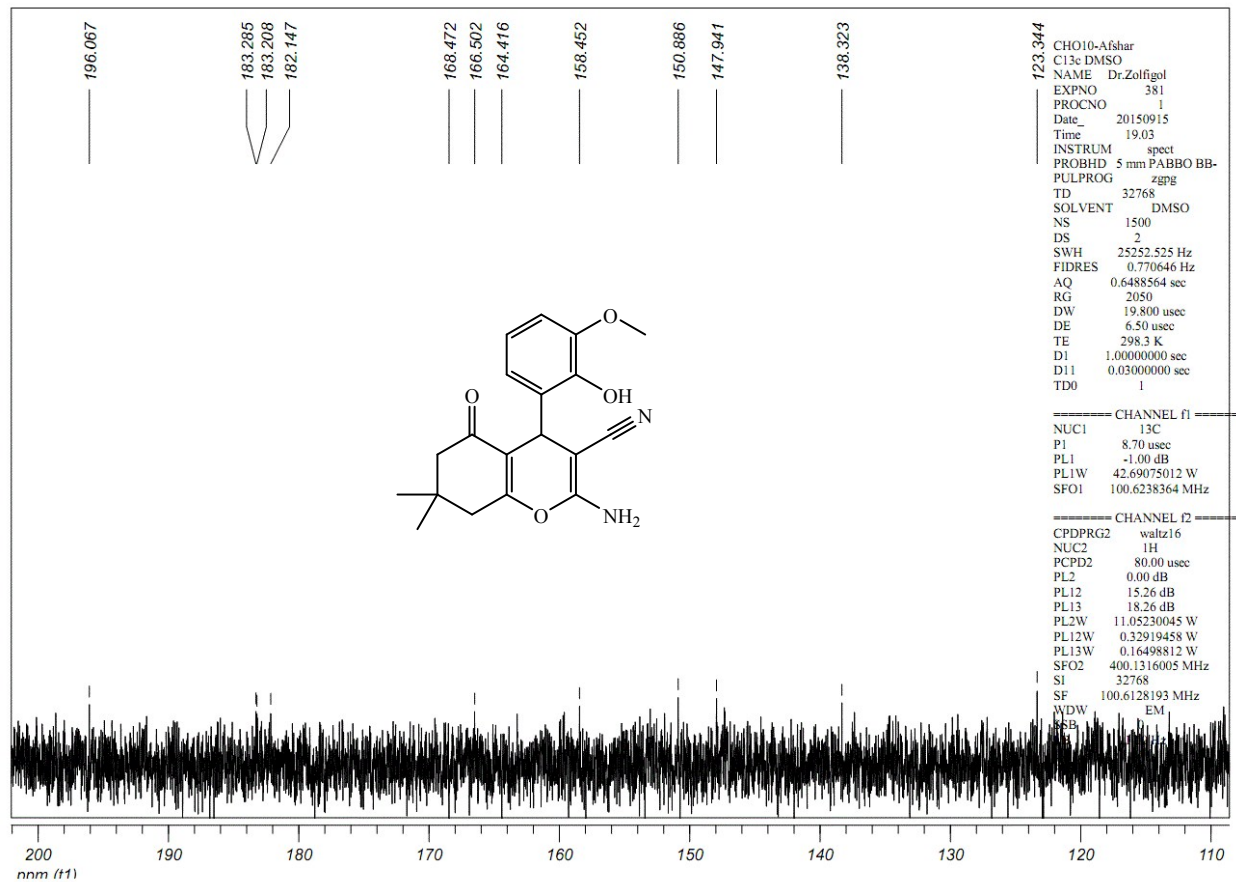

**Fig S18.** The IR spectrum of 2-amino-4-(2,5-dimethoxyphenyl)-7,7-dimethyl-5-oxo-5,6,7,8-tetrahydro-4H-chromene-3-carbonitrile (Table 3, entry 11)

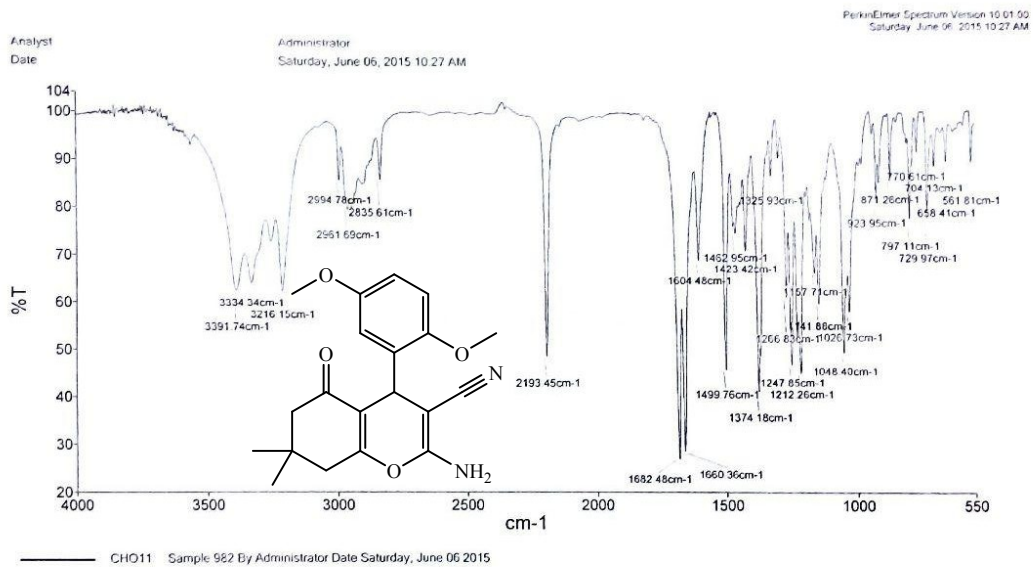

**Fig S19.** The  $^1\text{H}$  NMR spectrum of 2-amino-4-(2,5-dimethoxyphenyl)-7,7-dimethyl-5-oxo-5,6,7,8-tetrahydro-4H-chromene-3-carbonitrile (Table 3, entry 11)

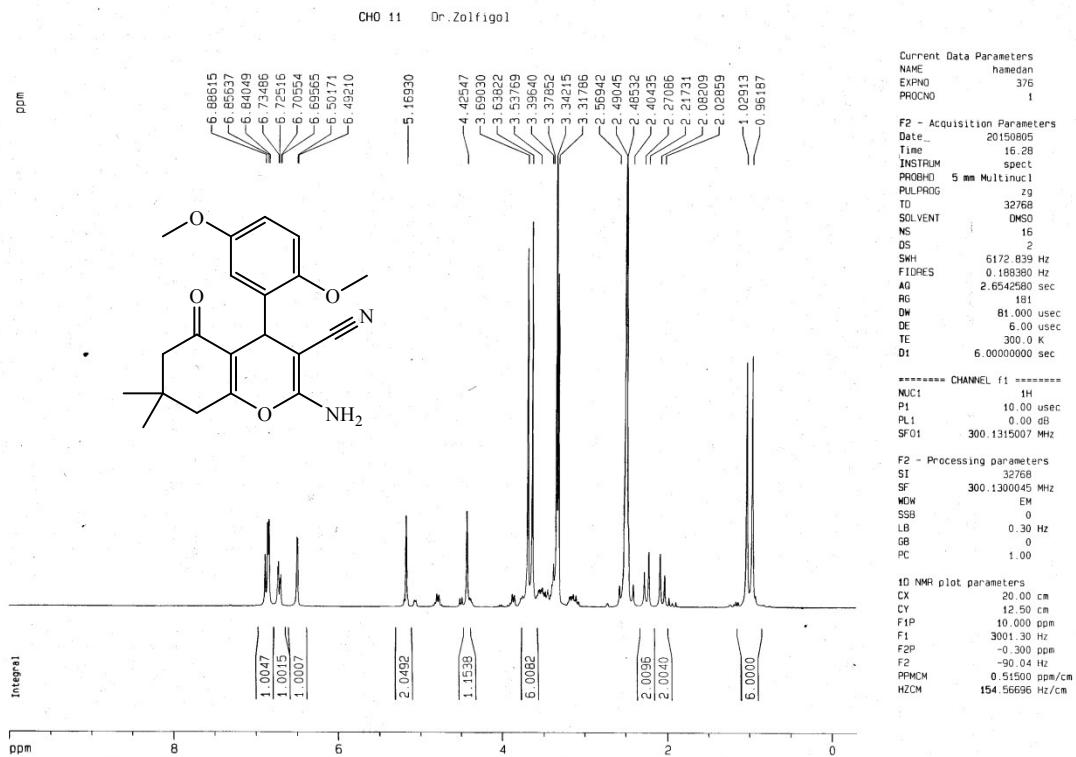

**Fig S20.** The  $^1\text{H}$  NMR spectrum of 2-amino-4-(2,5-dimethoxyphenyl)-7,7-dimethyl-5-oxo-5,6,7,8-tetrahydro-4H-chromene-3-carbonitrile (Table 3, entry 11)

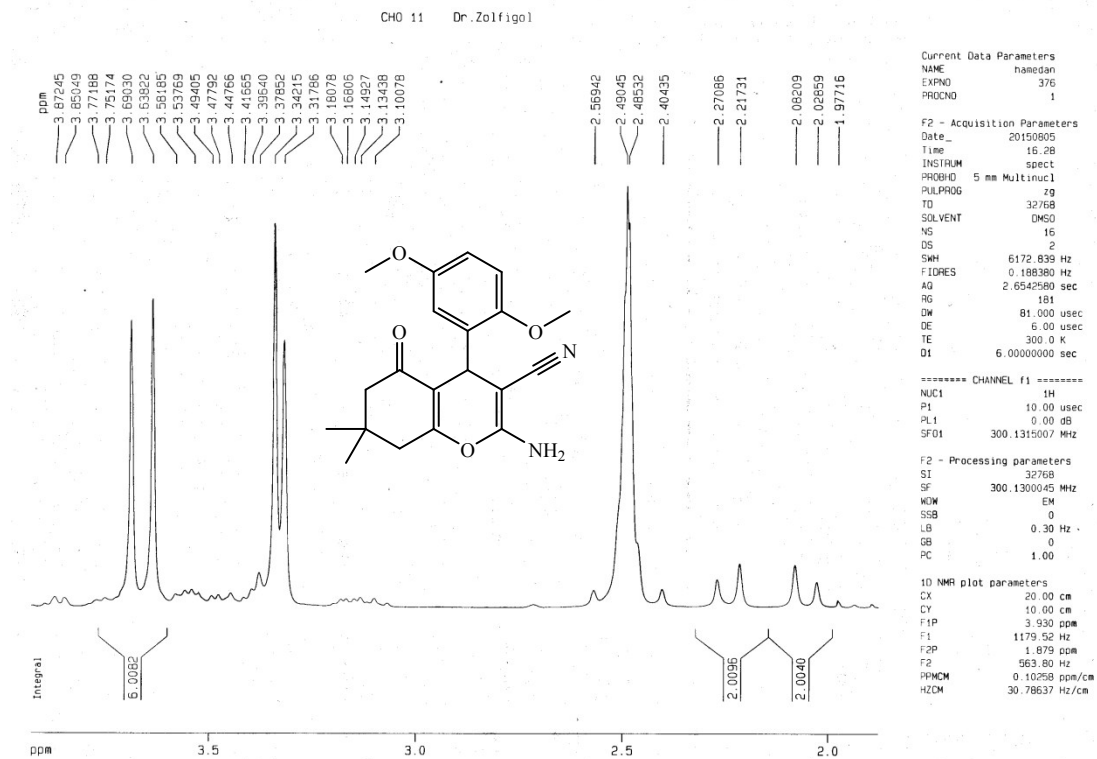

**Fig S21.** The  $^1\text{H}$  NMR spectrum of 2-amino-4-(2,5-dimethoxyphenyl)-7,7-dimethyl-5-oxo-5,6,7,8-tetrahydro-4H-chromene-3-carbonitrile (Table 3, entry 11)

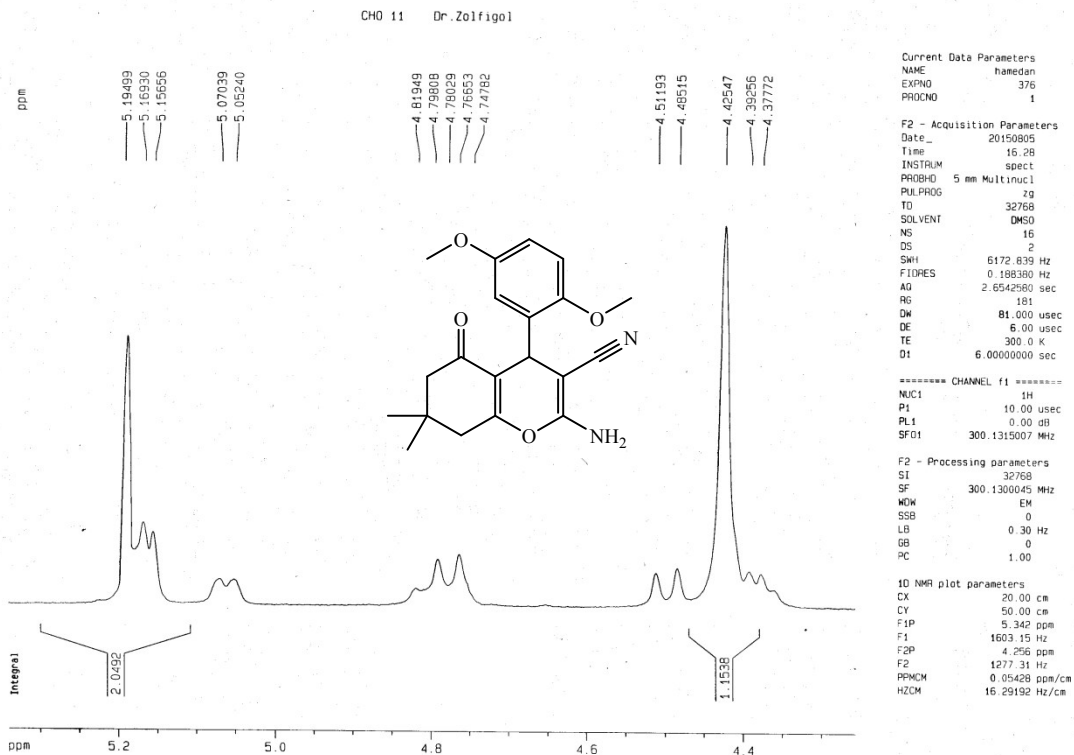

**Fig S22.** The  $^1\text{H}$  NMR spectrum of 2-amino-4-(2,5-dimethoxyphenyl)-7,7-dimethyl-5-oxo-5,6,7,8-tetrahydro-4H-chromene-3-carbonitrile (Table 3, entry 11)

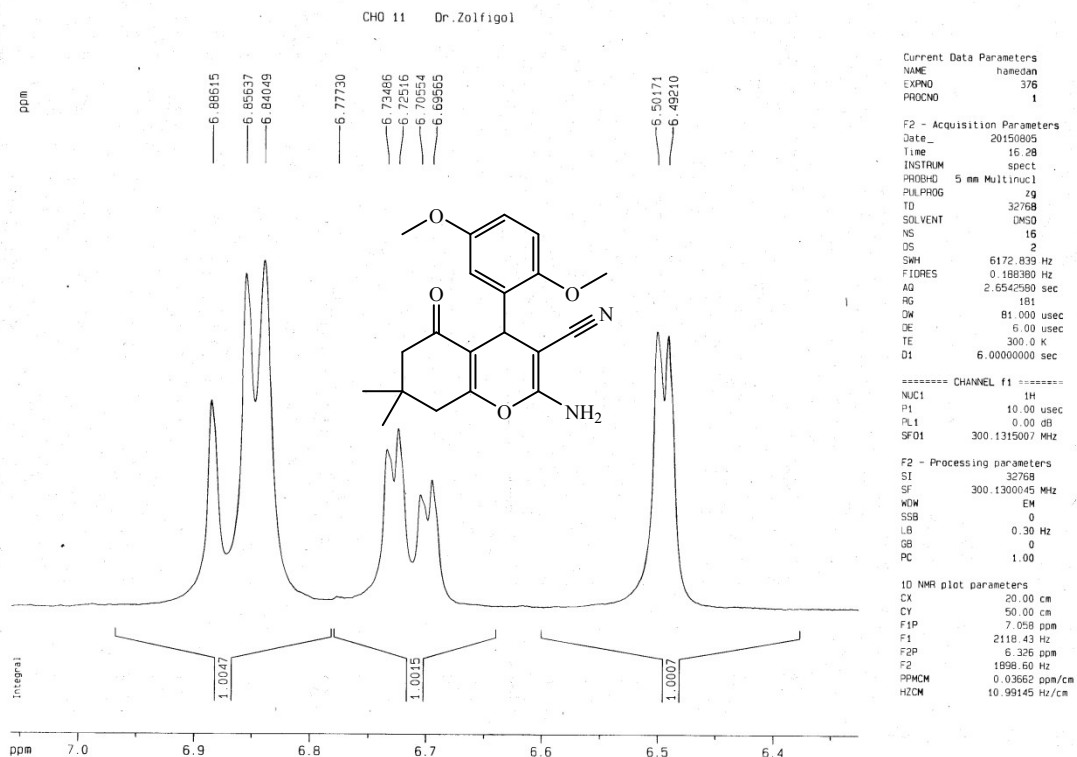

**Fig S23.** The  $^{13}\text{C}$  NMR spectrum of 2-amino-4-(2,5-dimethoxyphenyl)-7,7-dimethyl-5-oxo-5,6,7,8-tetrahydro-4H-chromene-3-carbonitrile (Table 3, entry 11)

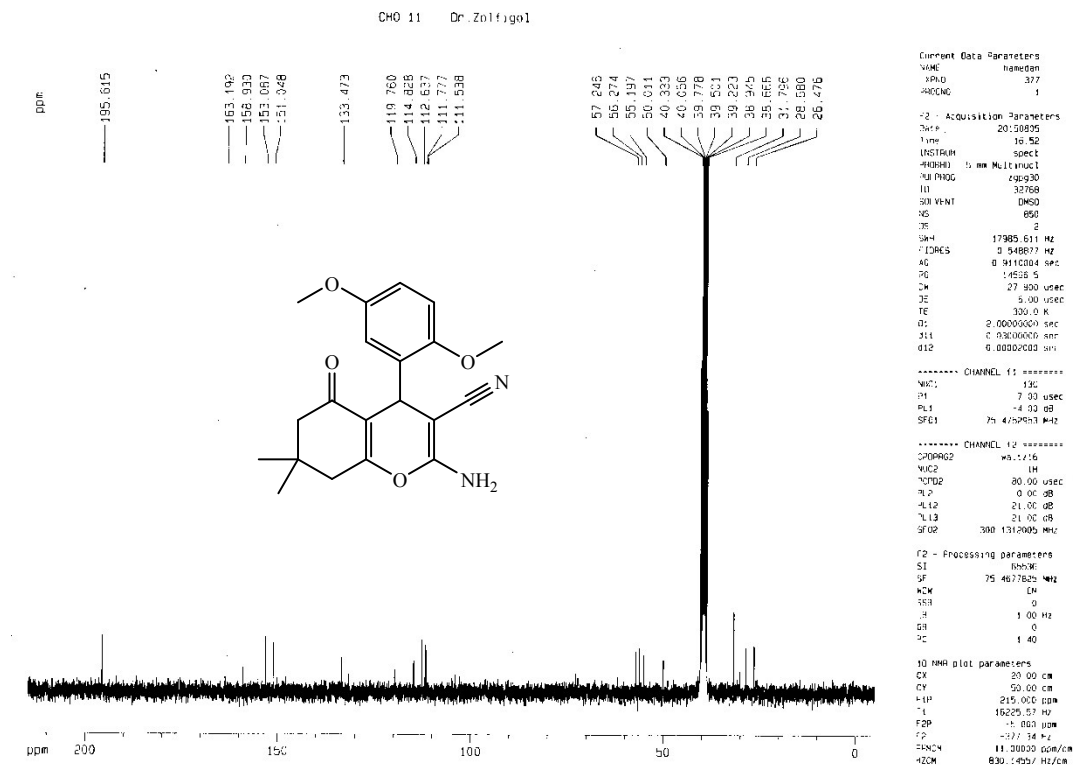



**Fig S24.** The  $^{13}\text{C}$  NMR spectrum of 2-amino-4-(2,5-dimethoxyphenyl)-7,7-dimethyl-5-oxo-5,6,7,8-tetrahydro-4H-chromene-3-carbonitrile (Table 3, entry 11)

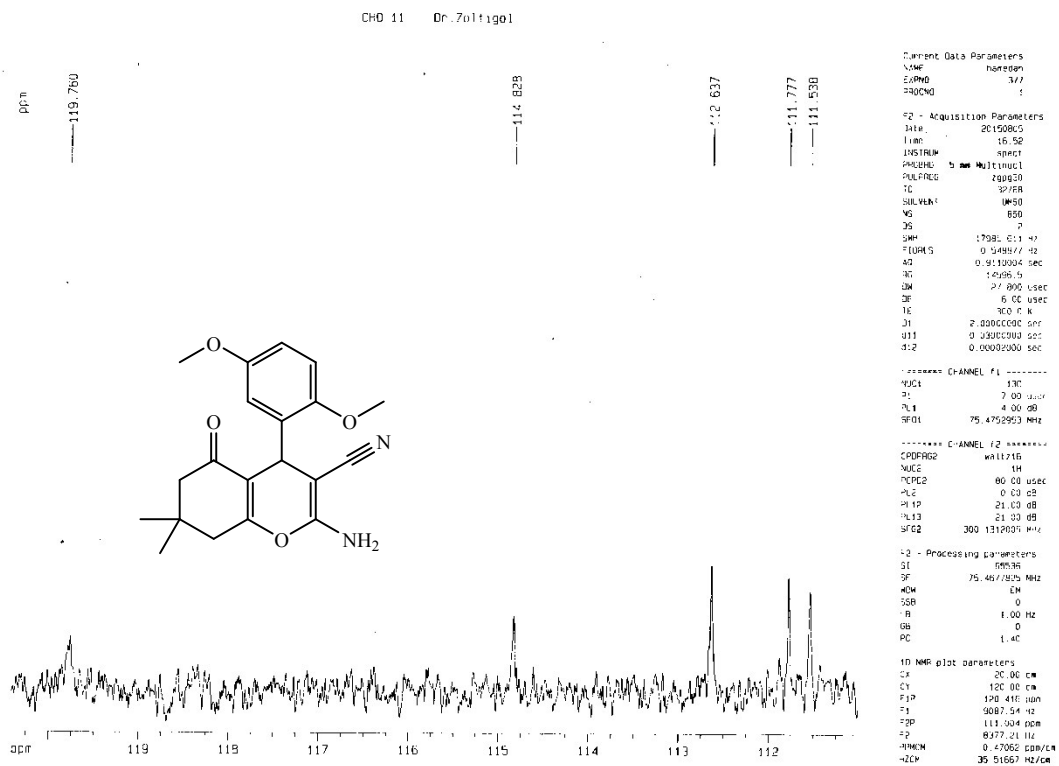

**Fig S25.** The IR spectrum of 4,4'-(1,4-phenylene)bis(2-amino-7,7-dimethyl-5-oxo-5,6,7,8-tetrahydro-4H-chromene-3-carbonitrile) (Table 3, entry 13)

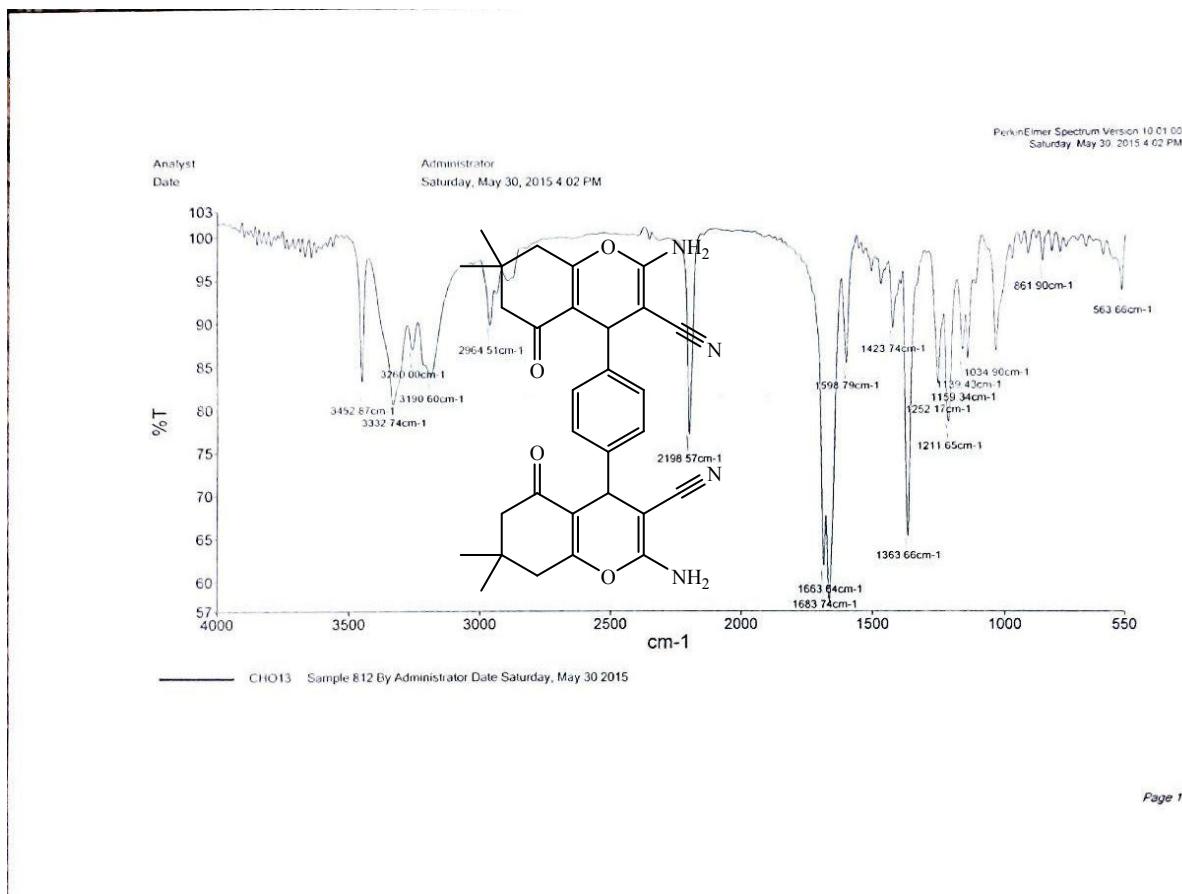

**Fig S26.** The  $^1\text{H}$  NMR spectrum of 4,4'-(1,4-phenylene)bis(2-amino-7,7-dimethyl-5-oxo-5,6,7,8-tetrahydro-4H-chromene-3-carbonitrile) (Table 3, entry 13)

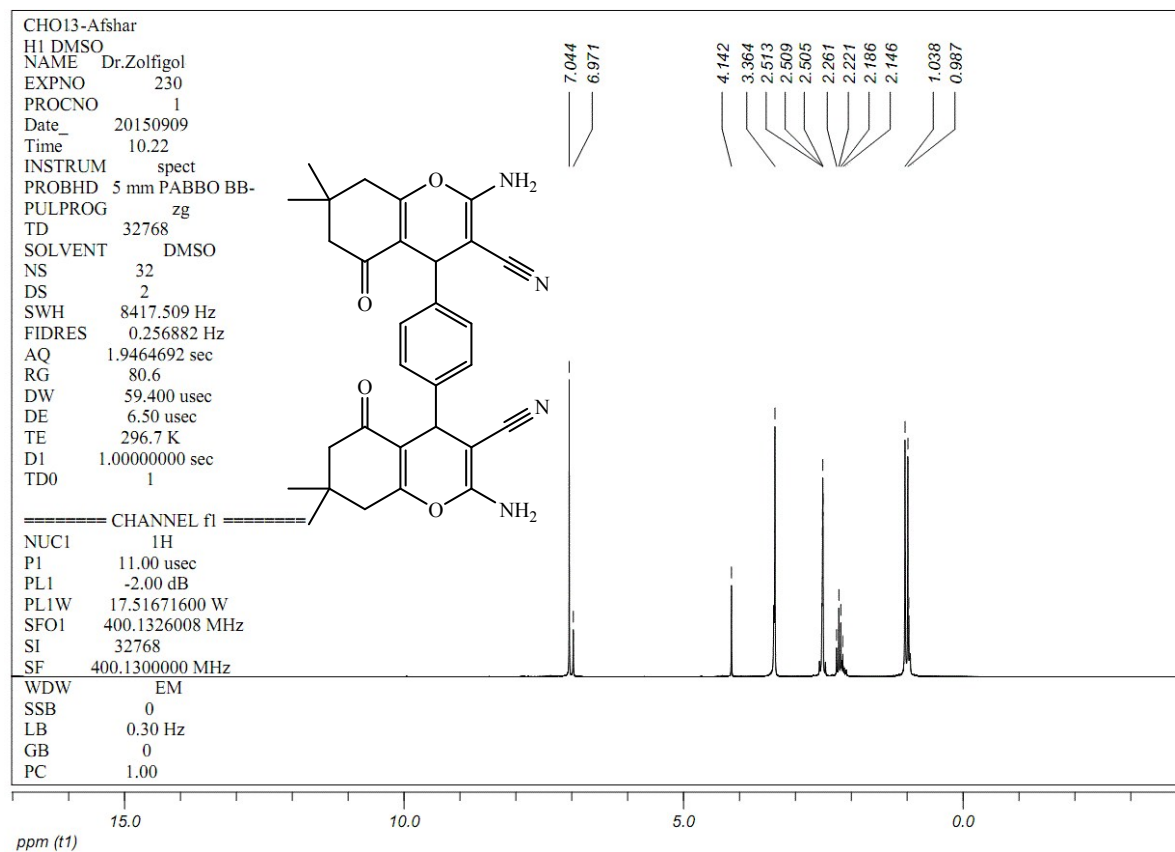

**Fig S27.** The  $^1\text{H}$  NMR spectrum of 4,4'-(1,4-phenylene)bis(2-amino-7,7-dimethyl-5-oxo-5,6,7,8-tetrahydro-4H-chromene-3-carbonitrile) (Table 3, entry 13)

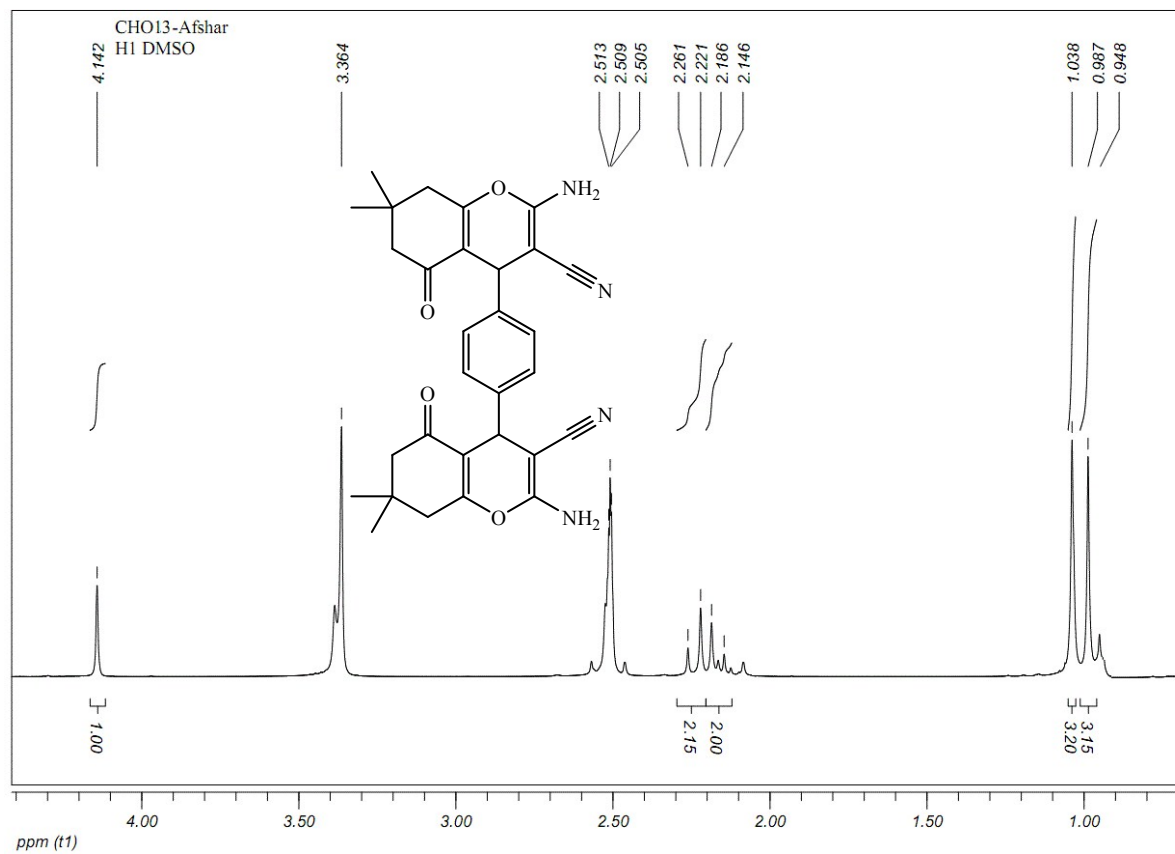

**Fig S28.** The  $^1\text{H}$  NMR spectrum of 4,4'-(1,4-phenylene)bis(2-amino-7,7-dimethyl-5-oxo-5,6,7,8-tetrahydro-4H-chromene-3-carbonitrile) (Table 3, entry 13)

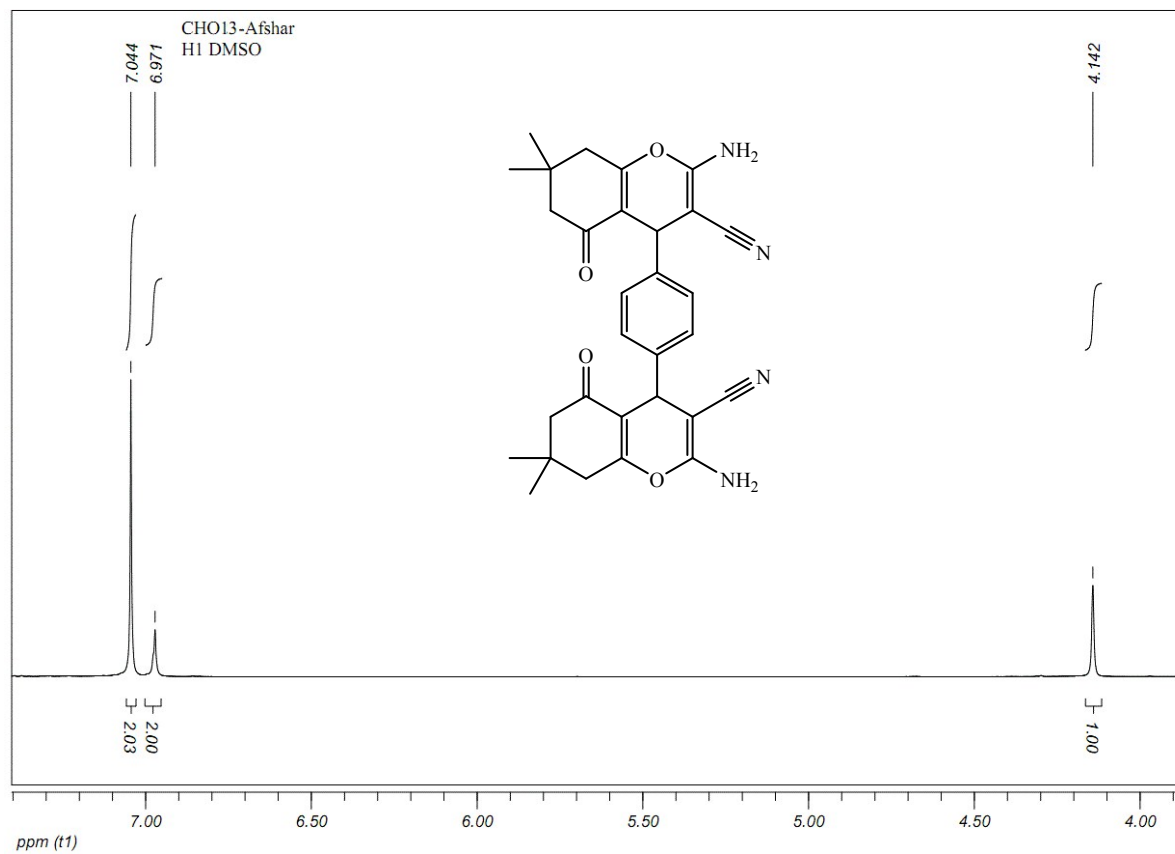

**Fig S29.** The  $^{13}\text{C}$  NMR spectrum of 4,4'-(1,4-phenylene)bis(2-amino-7,7-dimethyl-5-oxo-5,6,7,8-tetrahydro-4H-chromene-3-carbonitrile) (Table 3, entry 13)

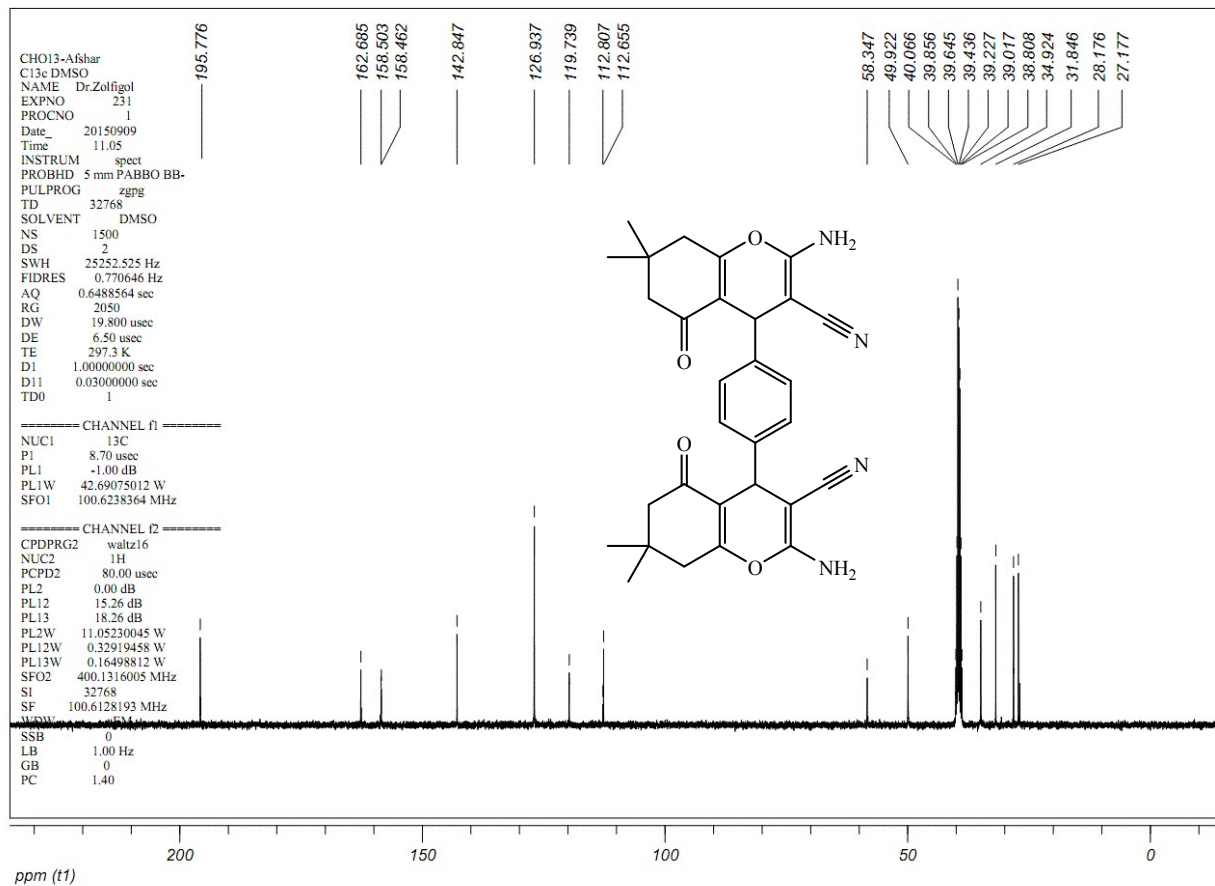

**Fig S30.** The IR spectrum of *2-amino-7,7-dimethyl-5-oxo-4-(pyridin-4-yl)-5,6,7,8-tetrahydro-4H-chromene-3-carbonitrile* (Table 3, entry 14)

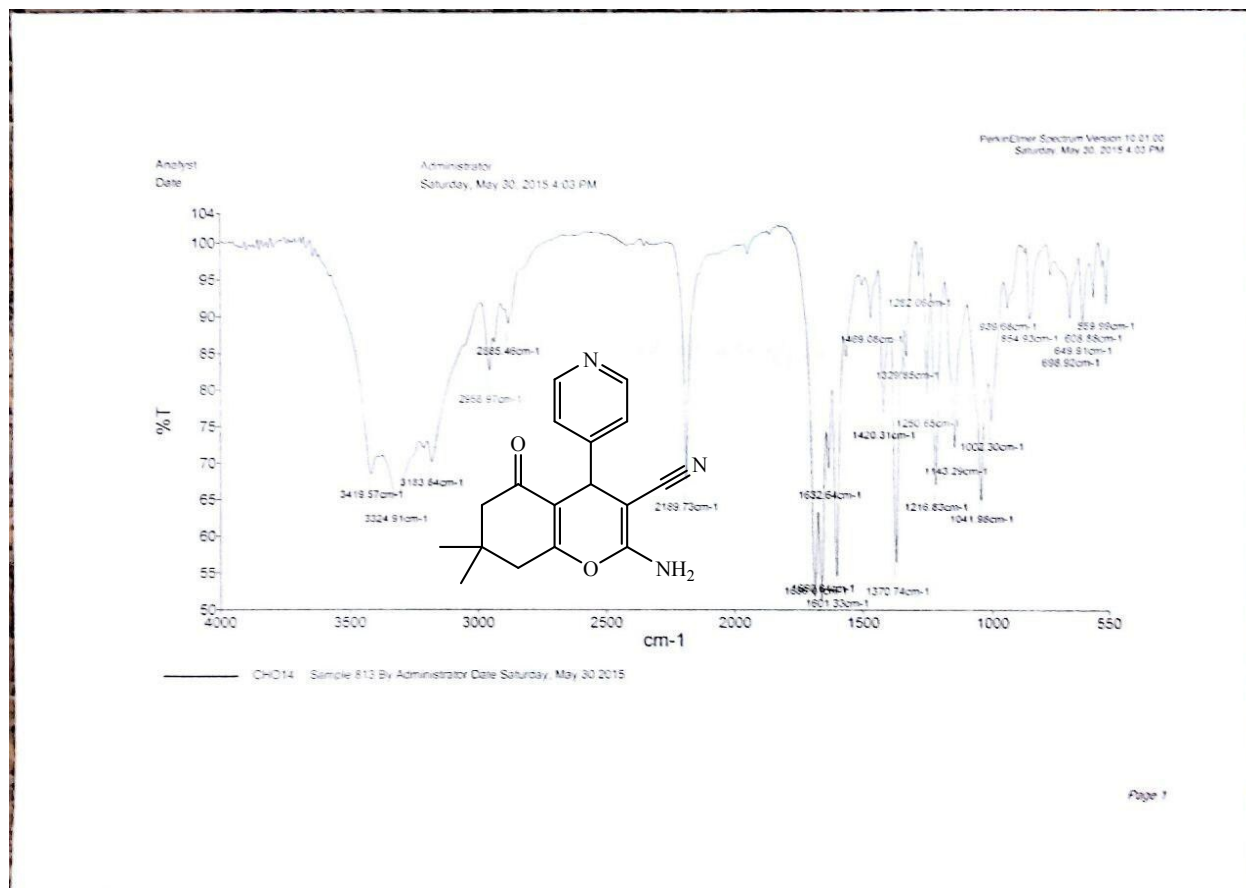

**Fig S31.** The  $^1\text{H}$  NMR spectrum of 2-amino-7,7-dimethyl-5-oxo-4-(pyridin-4-yl)-5,6,7,8-tetrahydro-4H-chromene-3-carbonitrile (Table 3, entry 14)

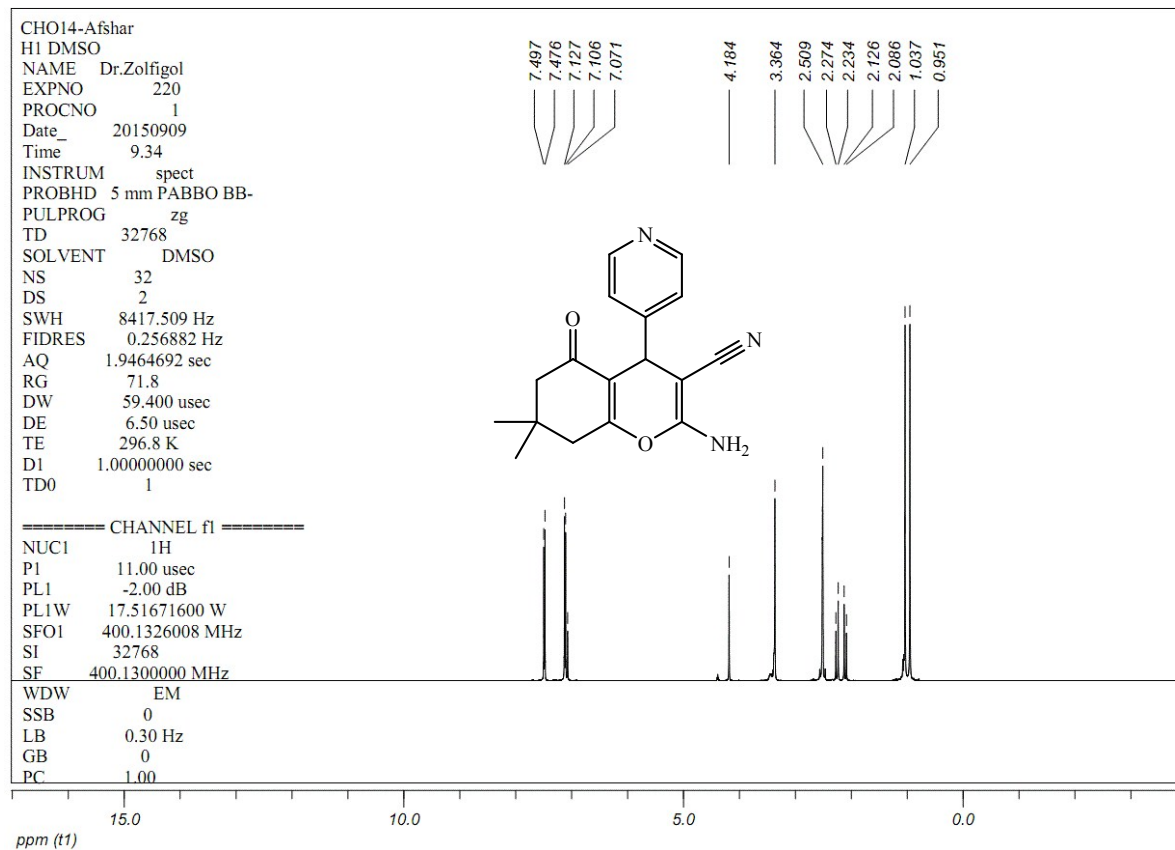



**Fig S32.** The  $^1\text{H}$  NMR spectrum of 2-amino-7,7-dimethyl-5-oxo-4-(pyridin-4-yl)-5,6,7,8-tetrahydro-4H-chromene-3-carbonitrile (Table 3, entry 14)

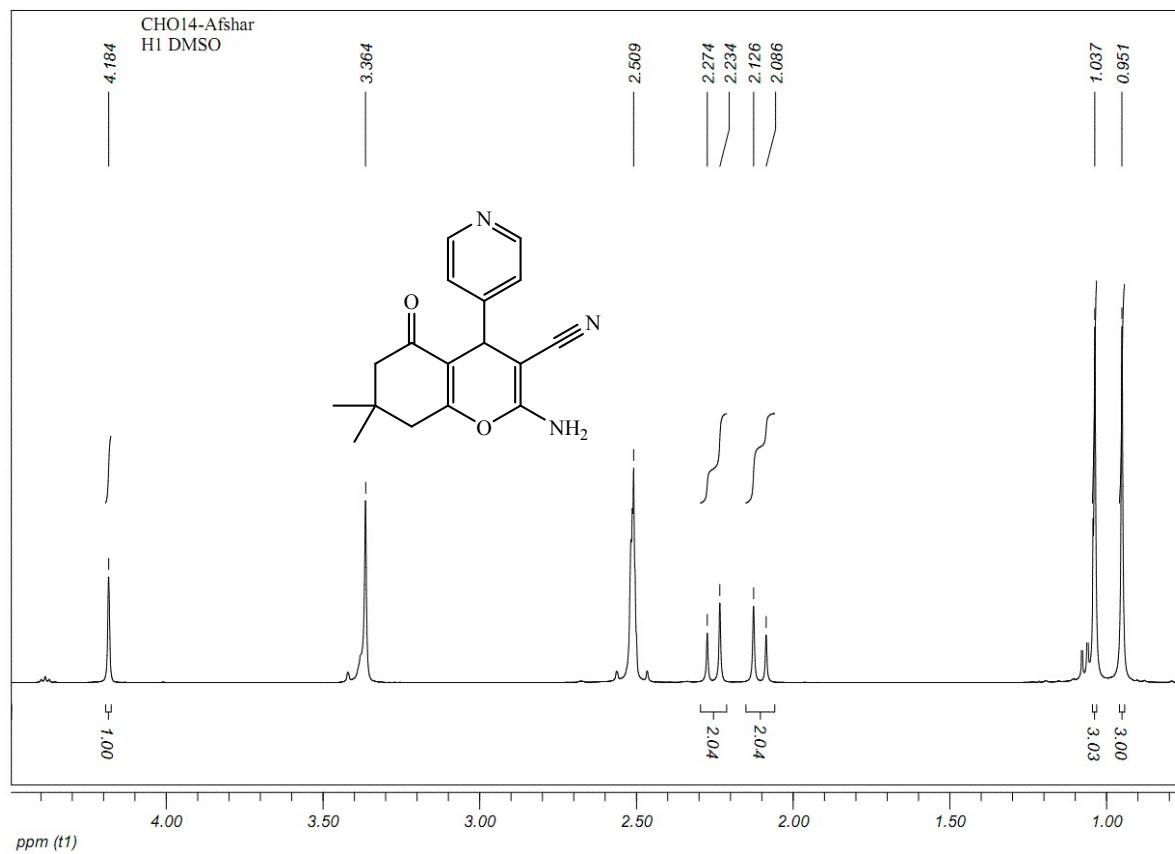

**Fig S33.** The  $^1\text{H}$  NMR spectrum of 2-amino-7,7-dimethyl-5-oxo-4-(pyridin-4-yl)-5,6,7,8-tetrahydro-4H-chromene-3-carbonitrile (Table 3, entry 14)

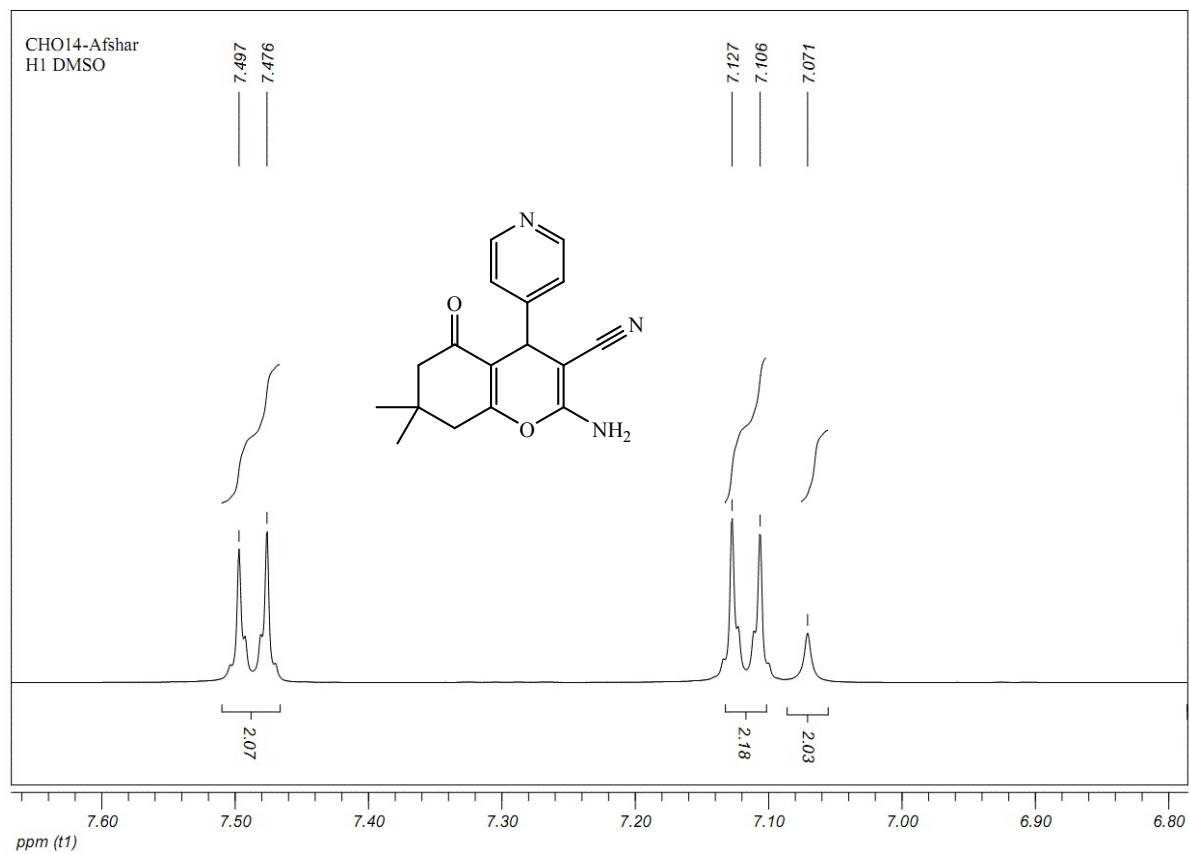

**Fig S34.** The  $^{13}\text{C}$  NMR spectrum of 2-amino-7,7-dimethyl-5-oxo-4-(pyridin-4-yl)-5,6,7,8-tetrahydro-4H-chromene-3-carbonitrile (Table 3, entry 14)

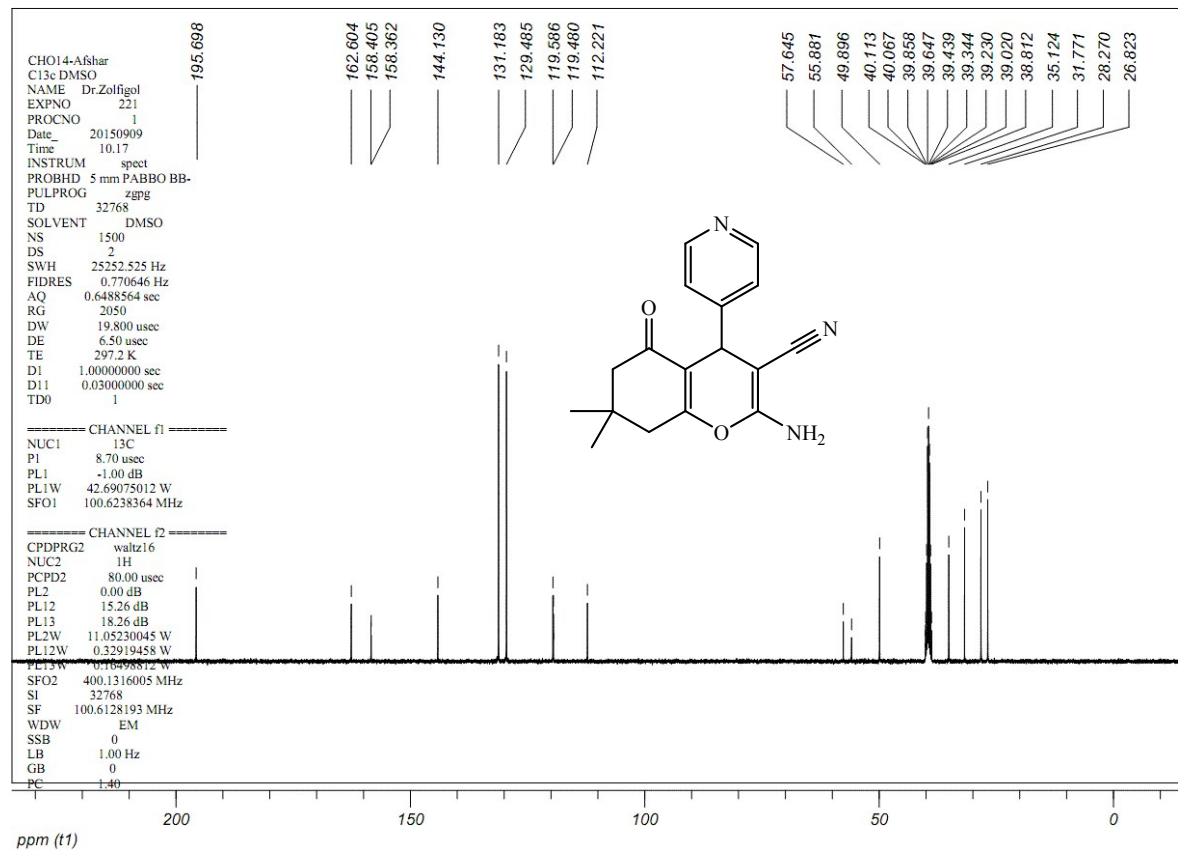

**Fig S35.** The IR spectrum of 2-amino-4-(2,4-dihydroxyphenyl)-7,7-dimethyl-5-oxo-5,6,7,8-tetrahydro-4H-chromene-3-carbonitrile (Table 3, entry 18)

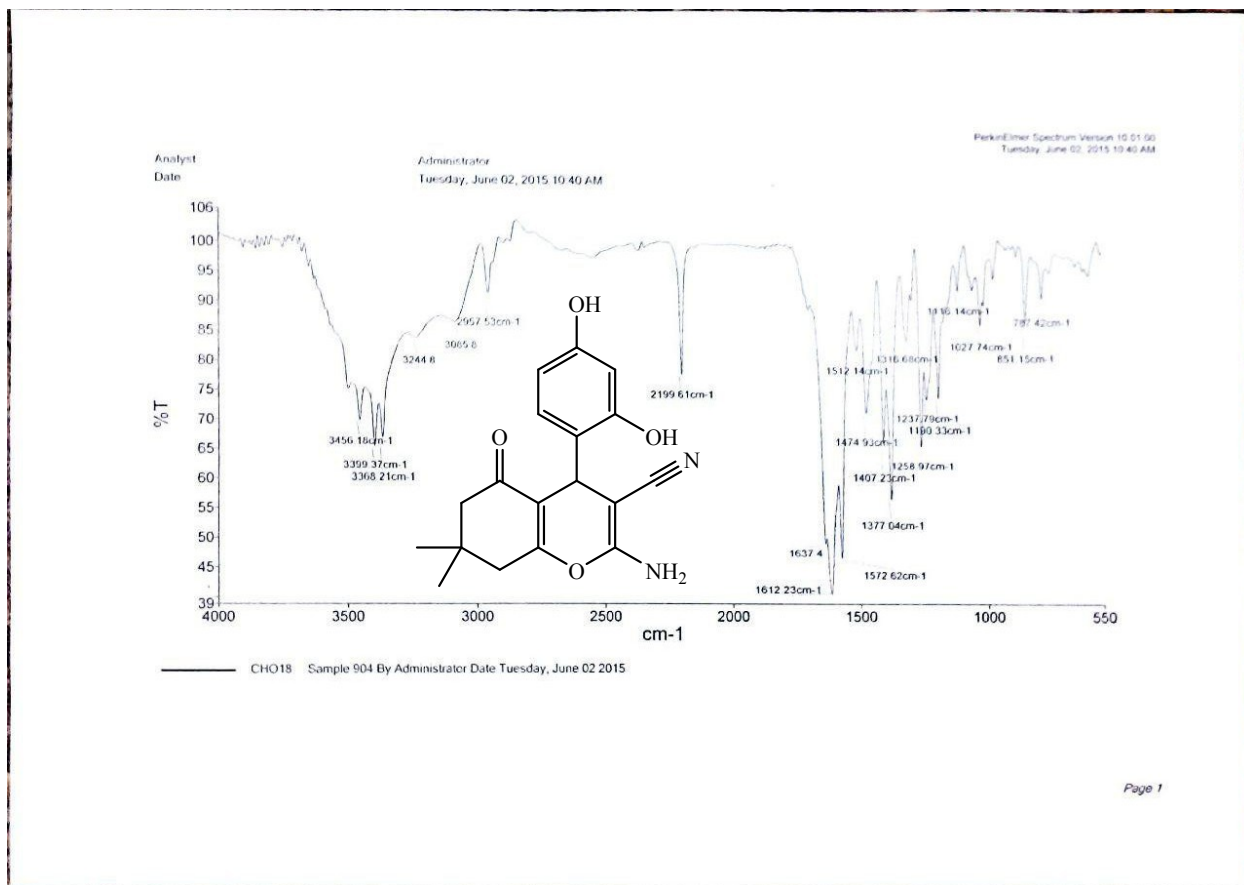

**Fig S36.** The  $^1\text{H}$  NMR spectrum of 2-amino-4-(2,4-dihydroxyphenyl)-7,7-dimethyl-5-oxo-5,6,7,8-tetrahydro-4H-chromene-3-carbonitrile (Table 3, entry 18)

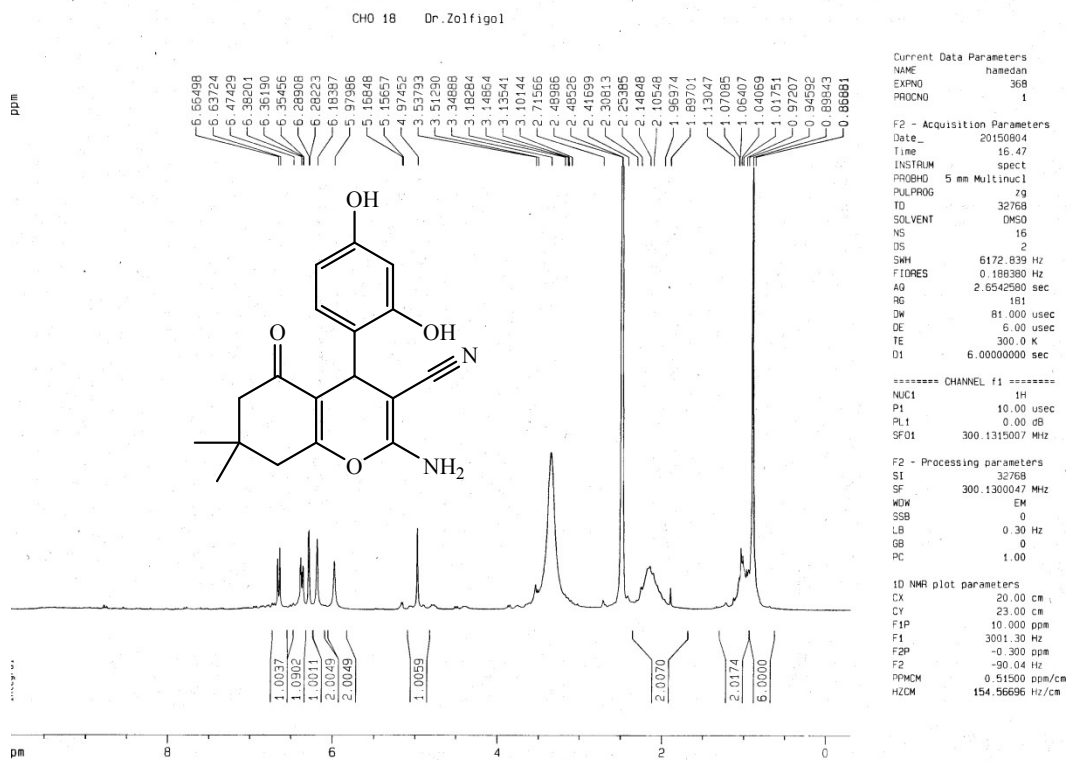

**Fig S37.** The  $^1\text{H}$  NMR spectrum of 2-amino-4-(2,4-dihydroxyphenyl)-7,7-dimethyl-5-oxo-5,6,7,8-tetrahydro-4H-chromene-3-carbonitrile (Table 3, entry 18)

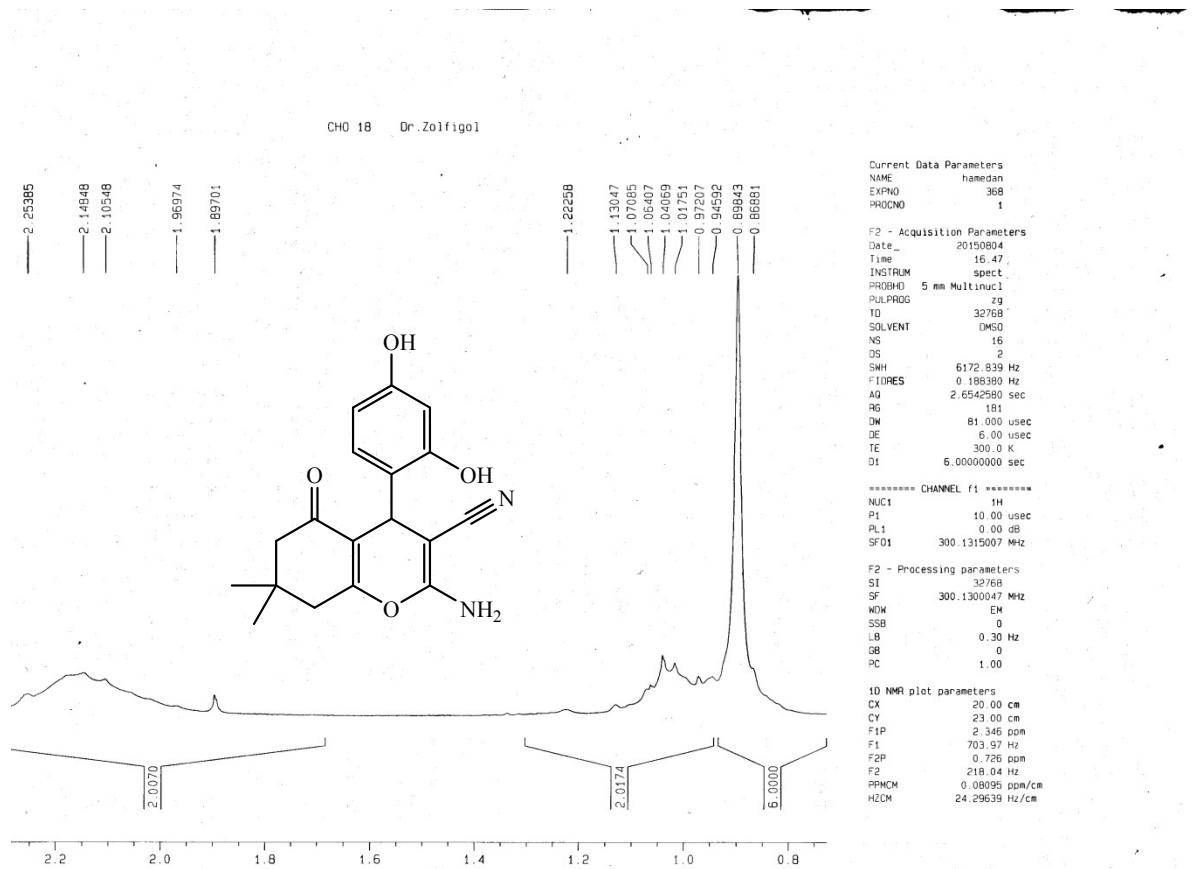

**Fig S38.** The  $^1\text{H}$  NMR spectrum of 2-amino-4-(2,4-dihydroxyphenyl)-7,7-dimethyl-5-oxo-5,6,7,8-tetrahydro-4H-chromene-3-carbonitrile (Table 3, entry 18)

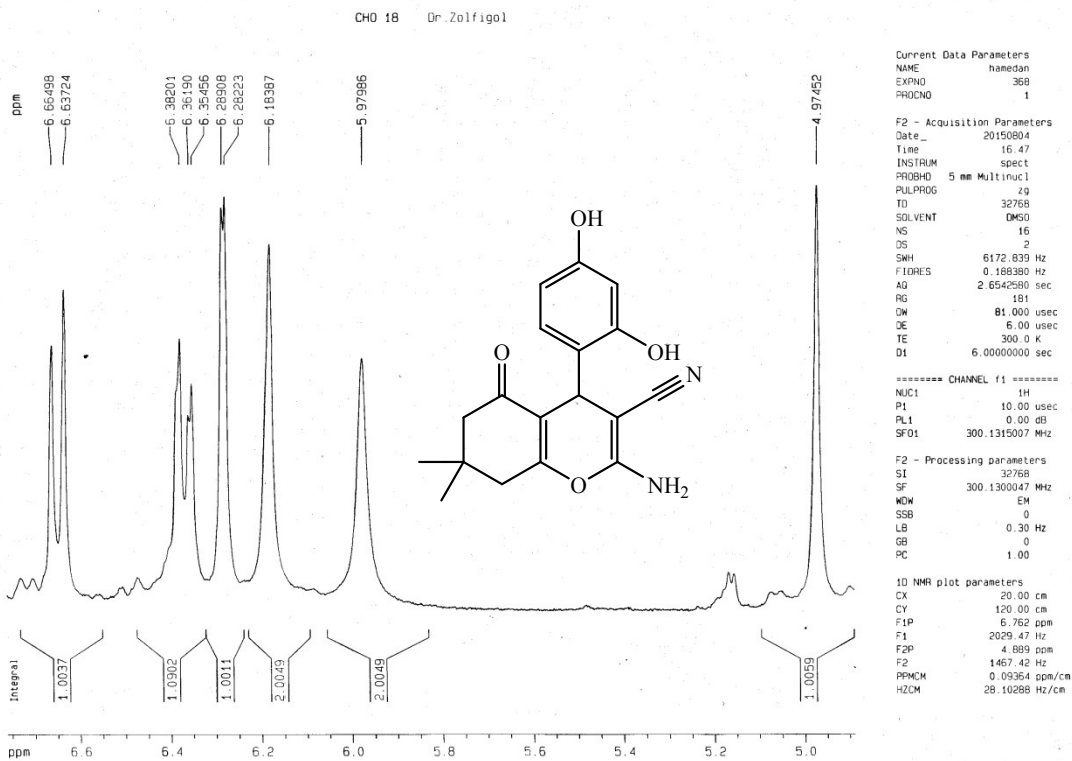

**Fig S39.** The  $^{13}\text{C}$  NMR spectrum of 2-amino-4-(2,4-dihydroxyphenyl)-7,7-dimethyl-5-oxo-5,6,7,8-tetrahydro-4H-chromene-3-carbonitrile (Table 3, entry 18)

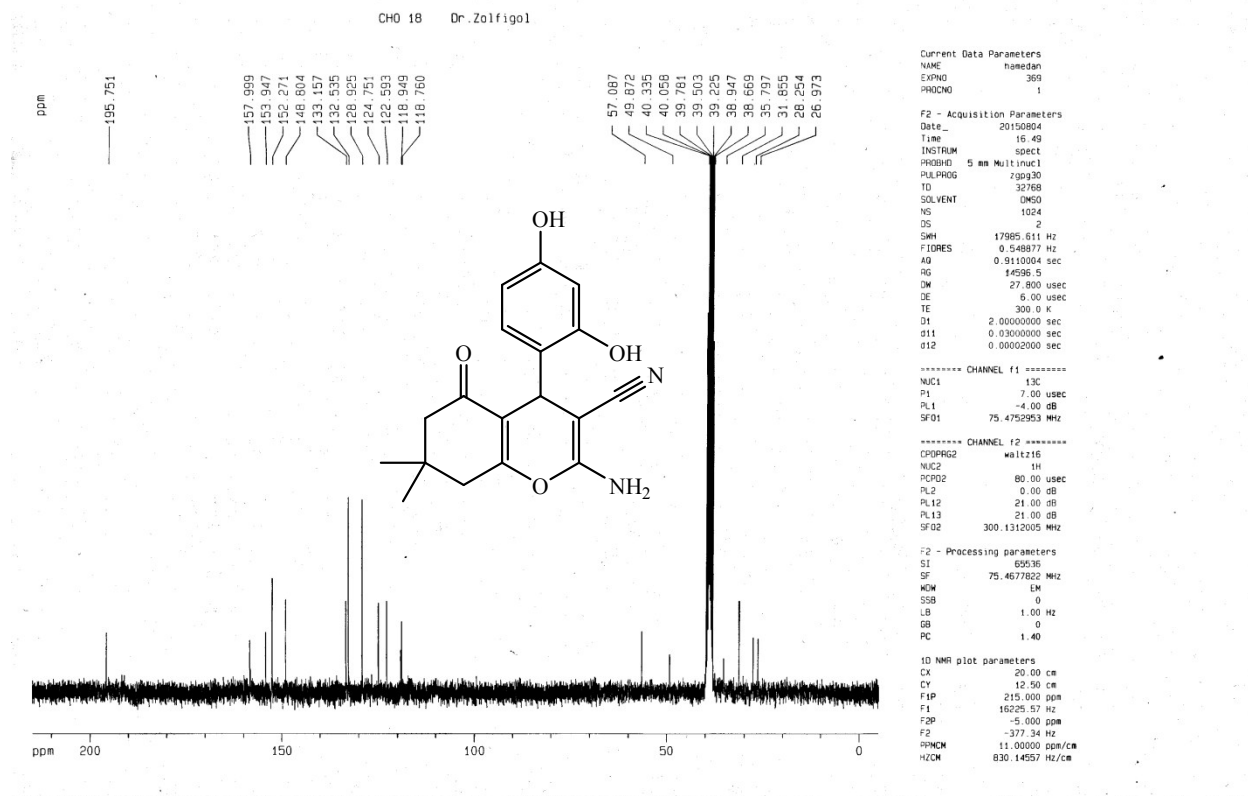



**Fig S40.** The IR spectrum of 2-amino-4-(3,4-dihydroxyphenyl)-7,7-dimethyl-5-oxo-5,6,7,8-tetrahydro-4H-chromene-3-carbonitrile (Table 3, entry 19)

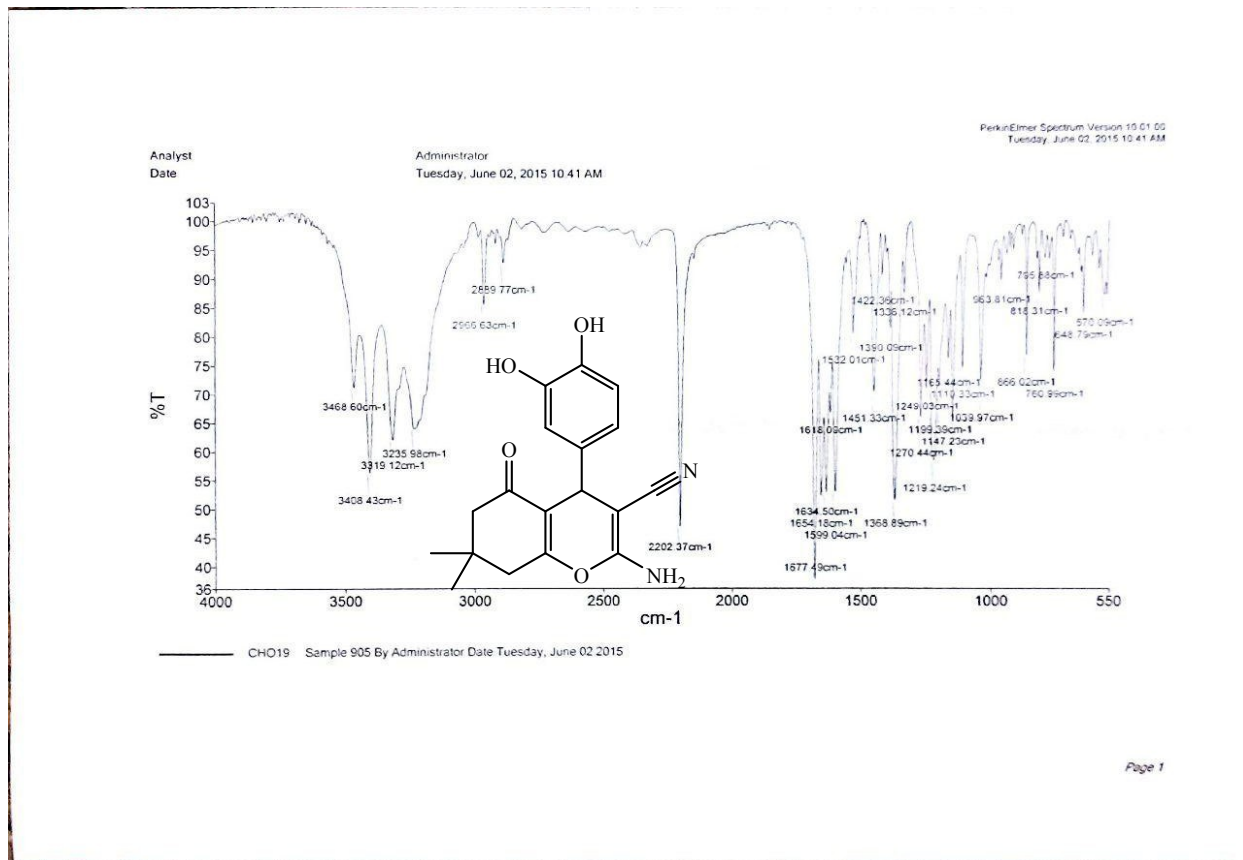

**Fig S41.** The  $^1\text{H}$  NMR spectrum of 2-amino-4-(3,4-dihydroxyphenyl)-7,7-dimethyl-5-oxo-5,6,7,8-tetrahydro-4H-chromene-3-carbonitrile (Table 3, entry 19)

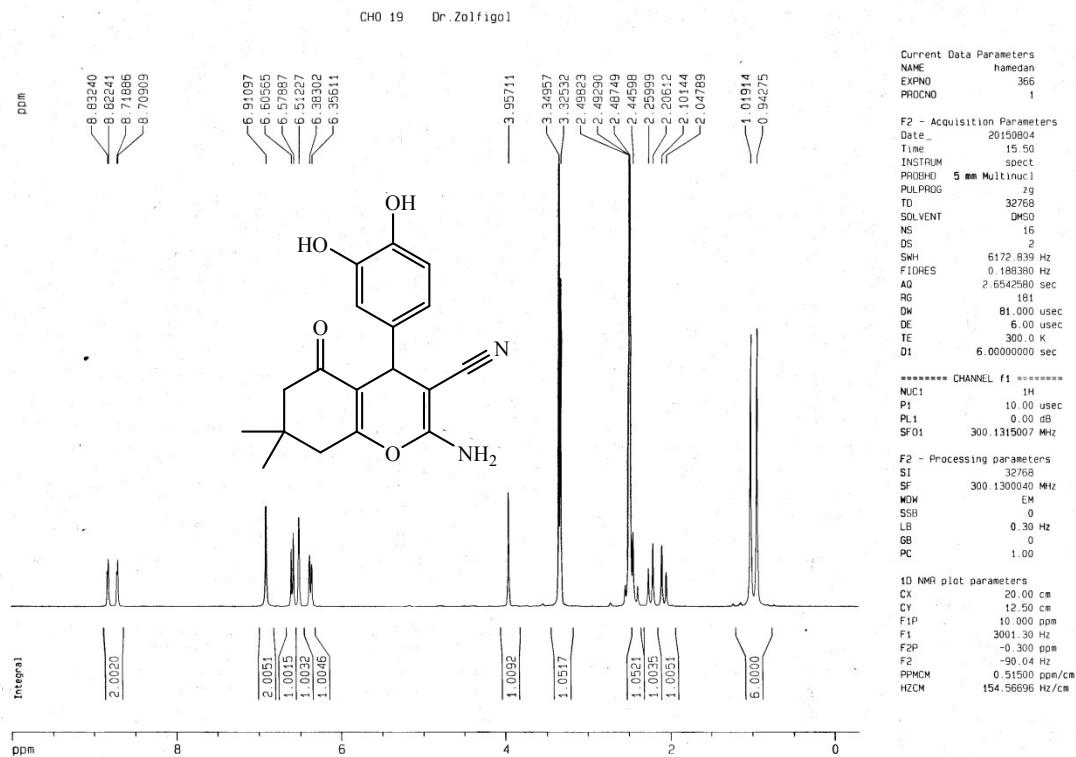

**Fig S42.** The  $^1\text{H}$  NMR spectrum of 2-amino-4-(3,4-dihydroxyphenyl)-7,7-dimethyl-5-oxo-5,6,7,8-tetrahydro-4H-chromene-3-carbonitrile (Table 3, entry 19)

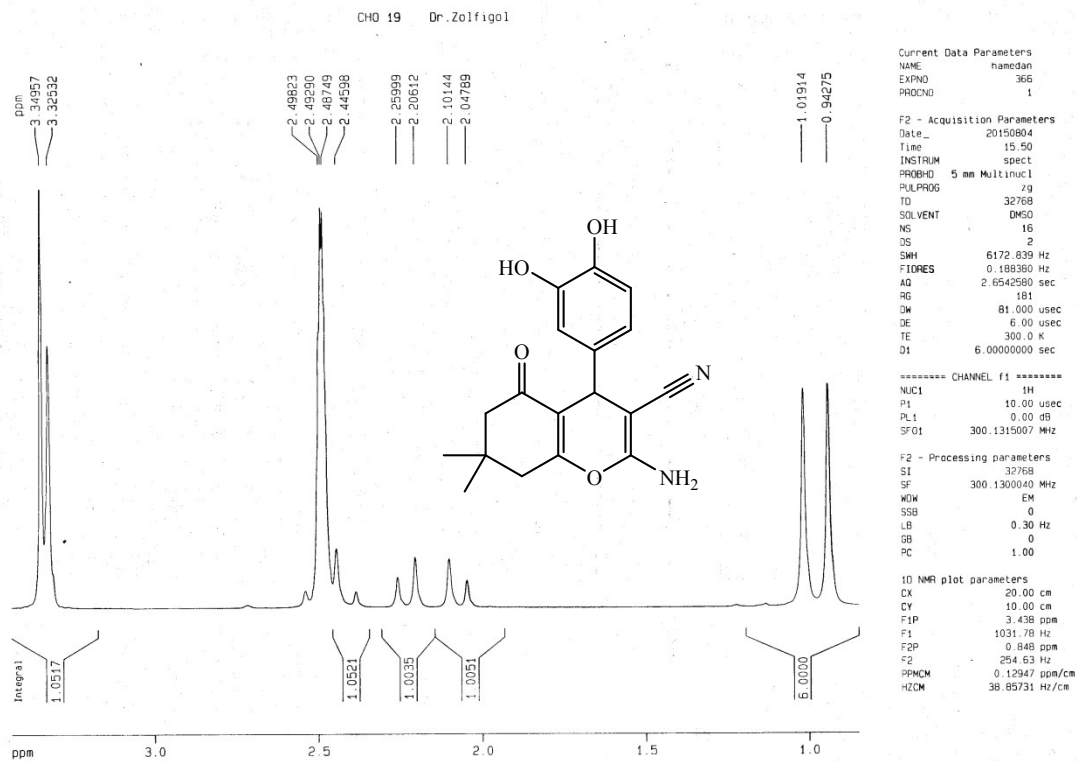

**Fig S43.** The  $^1\text{H}$  NMR spectrum of 2-amino-4-(2,4-dihydroxyphenyl)-7,7-dimethyl-5-oxo-5,6,7,8-tetrahydro-4H-chromene-3-carbonitrile (Table 3, entry 18)

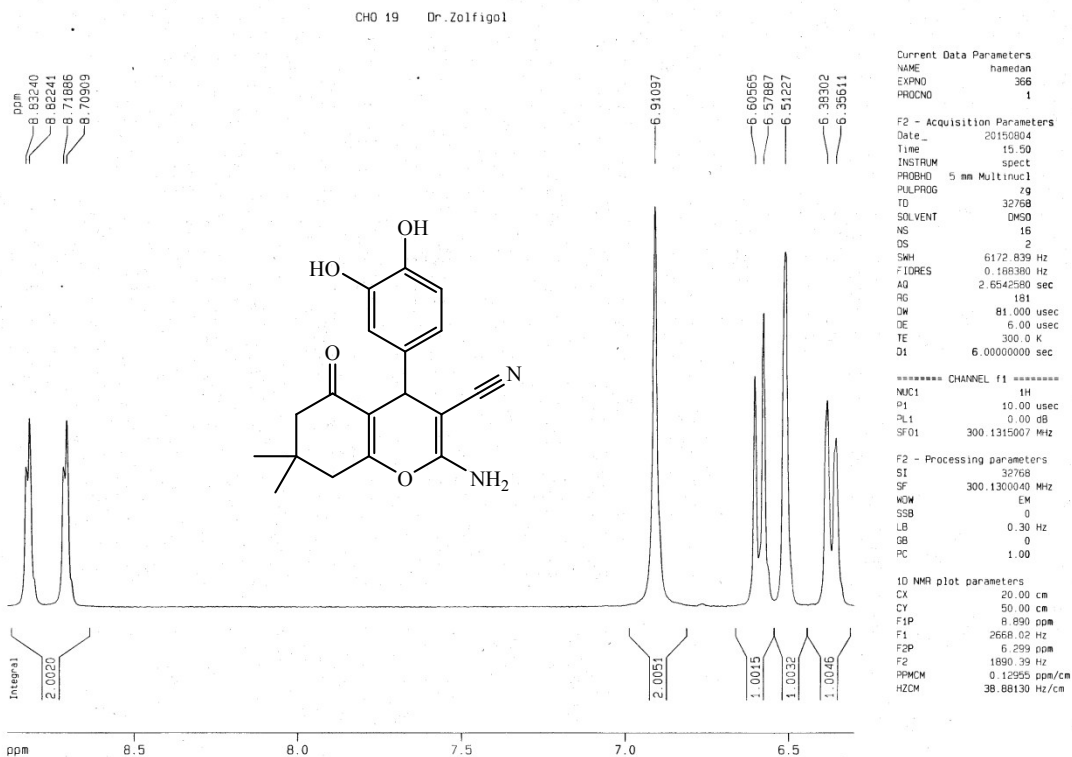

**Fig S44.** The  $^{13}\text{C}$  NMR spectrum of 2-amino-4-(3,4-dihydroxyphenyl)-7,7-dimethyl-5-oxo-5,6,7,8-tetrahydro-4H-chromene-3-carbonitrile (Table 3, entry 19)

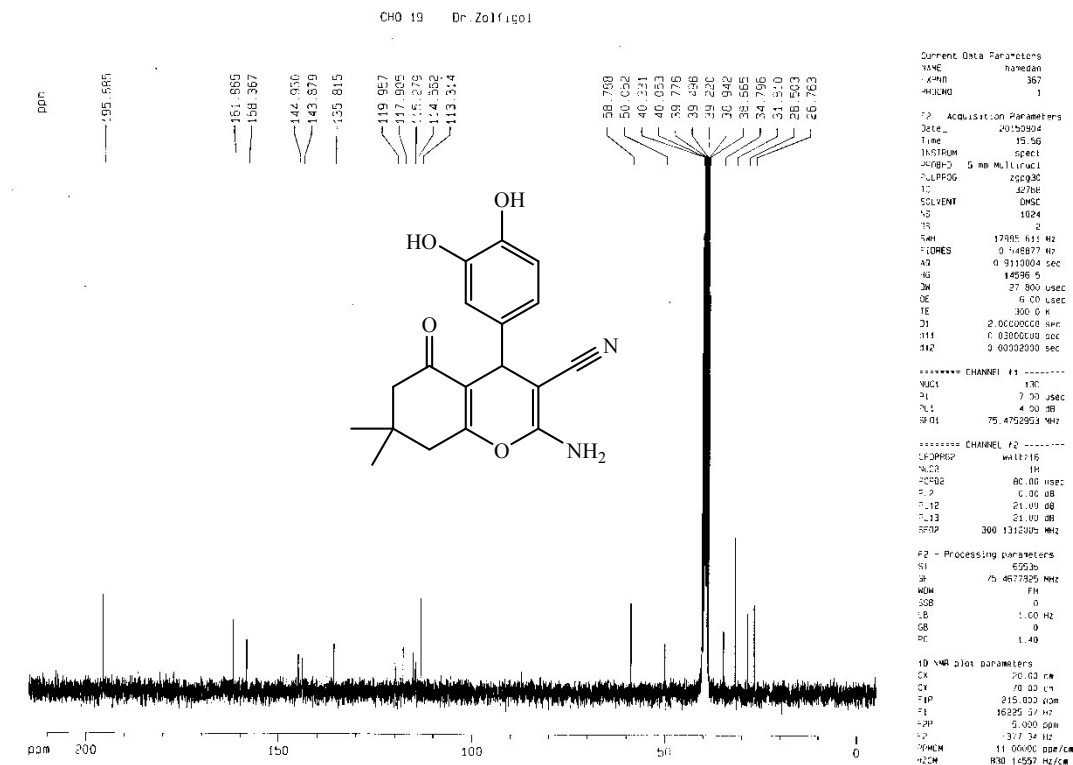

**Fig S45.** The  $^{13}\text{C}$  NMR spectrum of 2-amino-4-(3,4-dihydroxyphenyl)-7,7-dimethyl-5-oxo-5,6,7,8-tetrahydro-4H-chromene-3-carbonitrile (Table 3, entry 19)

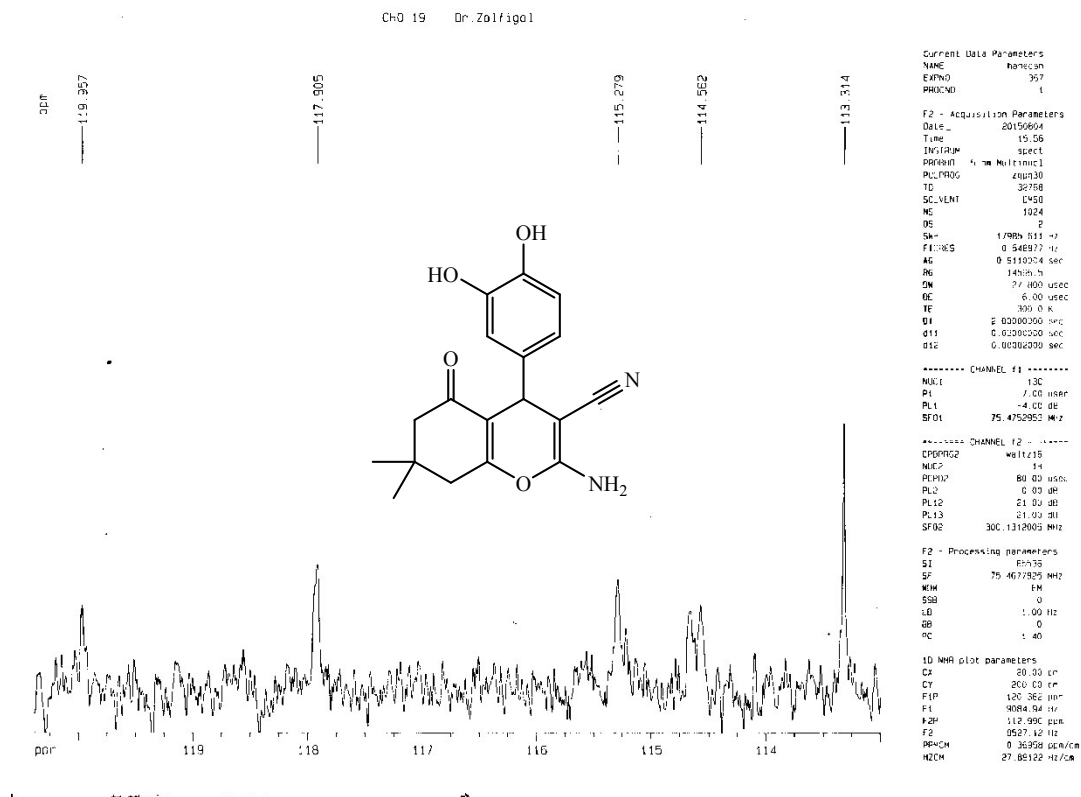

**Fig S46.** The  $^{13}\text{C}$  NMR spectrum of 2-amino-4-(3,4-dihydroxyphenyl)-7,7-dimethyl-5-oxo-5,6,7,8-tetrahydro-4H-chromene-3-carbonitrile (Table 3, entry 19)

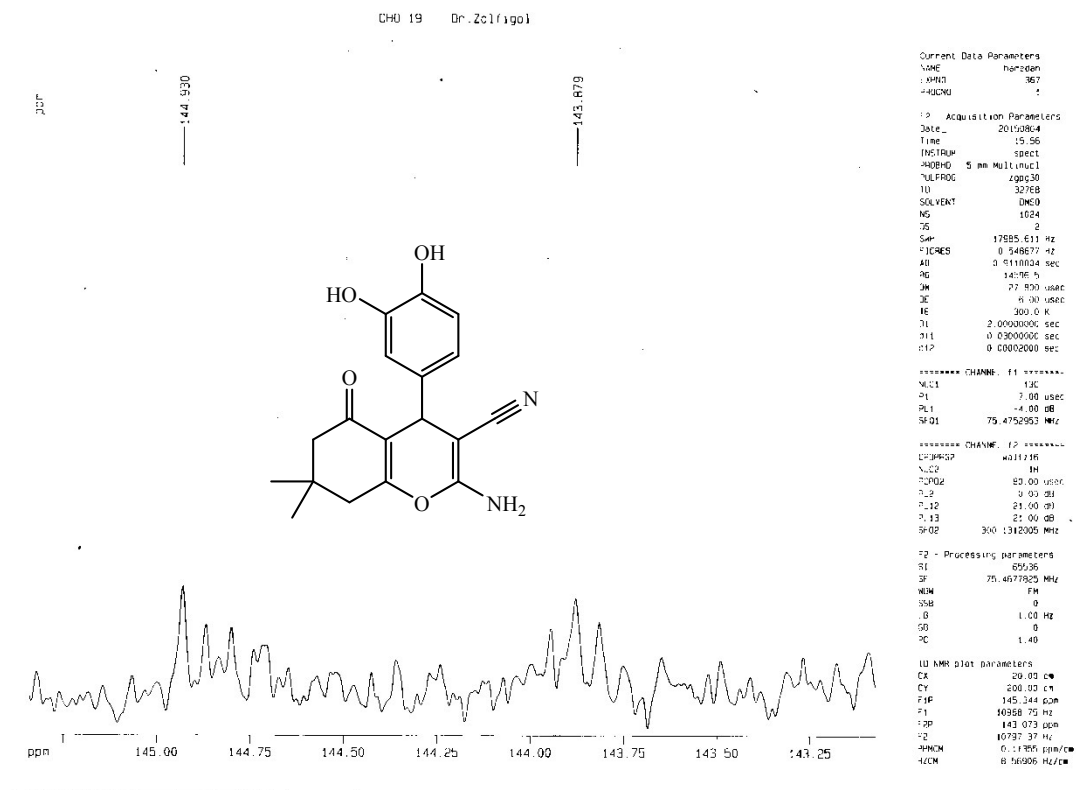

Supplement: c6nj00243a1.pdf [file c6nj00243a1.pdf]
